# Supplementary material for: Peer Review in Law Journals
Source: Front Res Metr Anal. 2021 Dec 8;6:787768. doi: 10.3389/frma.2021.787768 (PMC8692876; doi:10.3389/frma.2021.787768)
Supplement: Supplementary file 1 [file Table2.XLSX]

## Sheet: Cat 1st level
	FREQUENCY	% SHOWN	% PROCESSED	% TOTAL	NO. CASES	% CASES	TF • IDF
PR_PROCESS	1290	0.261	0.0185	0.01	129	0.9556	25.5
PR_EVALUATION	3174	0.6423	0.0456	0.0247	130	0.963	52
PR_ETHICS	478	0.0967	0.0069	0.0037	73	0.5407	127.6

## Sheet: Cat 2nd level
	FREQUENCY	% SHOWN	% PROCESSED	% TOTAL	NO. CASES	% CASES	TF • IDF
PR_PROCESS\REVIEWER	337	0.0682	0.0048	0.0026	98	0.7259	46.9
PR_PROCESS\ID_TRANSP	332	0.0672	0.0048	0.0026	104	0.7704	37.6
PR_PROCESS\GOVERNANCE	621	0.1257	0.0089	0.0048	108	0.8	60.2
PR_EVALUATION\PUBL_TYPE	520	0.1052	0.0075	0.004	103	0.763	61.1
PR_EVALUATION\PR_OUTCOME	630	0.1275	0.009	0.0049	110	0.8148	56
PR_EVALUATION\EVAL_CRITER	2024	0.4096	0.0291	0.0158	122	0.9037	89
PR_ETHICS\TEXT_SIMILAR*	85	0.0172	0.0012	0.0007	35	0.2593	49.8
PR_ETHICS\RES_MISCONDUCT	70	0.0142	0.001	0.0005	25	0.1852	51.3
PR_ETHICS\ETH_GUID	64	0.013	0.0009	0.0005	28	0.2074	43.7
PR_ETHICS\EDI	111	0.0225	0.0016	0.0009	30	0.2222	72.5
PR_ETHICS\CONFIDENT	16	0.0032	0.0002	0.0001	9	0.0667	18.8
PR_ETHICS\COI	132	0.0267	0.0019	0.001	43	0.3185	65.6

## Sheet: Cat 3rd level
	FREQUENCY	% SHOWN	% PROCESSED	% TOTAL	NO. CASES	% CASES	TF • IDF
PR_PROCESS\REVIEWER\OBJECTIVITY	58	0.0117	0.0008	0.0005	31	0.2296	37.1
PR_PROCESS\REVIEWER\NUMBER	65	0.0132	0.0009	0.0005	29	0.2148	43.4
PR_PROCESS\REVIEWER\INDEPEND	116	0.0235	0.0017	0.0009	65	0.4815	36.8
PR_PROCESS\REVIEWER\COMPETENCE	98	0.0198	0.0014	0.0008	51	0.3778	41.4
PR_PROCESS\ID_TRANSP\VISIBLE	1	0.0002	0	0	1	0.0074	2.1
PR_PROCESS\ID_TRANSP\ANONYM	331	0.067	0.0048	0.0026	104	0.7704	37.5
PR_PROCESS\GOVERNANCE\STEER_COMM	23	0.0047	0.0003	0.0002	3	0.0222	38
PR_PROCESS\GOVERNANCE\SCI/ADVISOR_BOARD	59	0.0119	0.0008	0.0005	23	0.1704	45.3
PR_PROCESS\GOVERNANCE\REV_BOARD	1	0.0002	0	0	1	0.0074	2.1
PR_PROCESS\GOVERNANCE\GOVERN_BOARD	10	0.002	0.0001	0.0001	1	0.0074	21.3
PR_PROCESS\GOVERNANCE\ED_BOARD	392	0.0793	0.0056	0.0031	81	0.6	87
PR_PROCESS\GOVERNANCE\EDITOR_IN_CHIEF	136	0.0275	0.002	0.0011	51	0.3778	57.5
PR_EVALUATION\PUBL_TYPE\REV_PAPER	16	0.0032	0.0002	0.0001	14	0.1037	15.7
PR_EVALUATION\PUBL_TYPE\PRE_COMM	42	0.0085	0.0006	0.0003	26	0.1926	30
PR_EVALUATION\PUBL_TYPE\NOTE	53	0.0107	0.0008	0.0004	26	0.1926	37.9
PR_EVALUATION\PUBL_TYPE\EXPERIENCE	10	0.002	0.0001	0.0001	5	0.037	14.3
PR_EVALUATION\PUBL_TYPE\ESSAY	41	0.0083	0.0006	0.0003	19	0.1407	34.9
PR_EVALUATION\PUBL_TYPE\DEBATE	18	0.0036	0.0003	0.0001	13	0.0963	18.3
PR_EVALUATION\PUBL_TYPE\CRIT_DISCUSS	3	0.0006	0	0	2	0.0148	5.5
PR_EVALUATION\PUBL_TYPE\CONF_REV	4	0.0008	0.0001	0	3	0.0222	6.6
PR_EVALUATION\PUBL_TYPE\CONF_PAPER	51	0.0103	0.0007	0.0004	18	0.1333	44.6
PR_EVALUATION\PUBL_TYPE\COMMENT	3	0.0006	0	0	2	0.0148	5.5
PR_EVALUATION\PUBL_TYPE\BOOK_REV	35	0.0071	0.0005	0.0003	26	0.1926	25
PR_EVALUATION\PUBL_TYPE\ARTICLE	244	0.0494	0.0035	0.0019	68	0.5037	72.7
PR_EVALUATION\PR_OUTCOME\REJECT	113	0.0229	0.0016	0.0009	53	0.3926	45.9
PR_EVALUATION\PR_OUTCOME\ACCEPT	517	0.1046	0.0074	0.004	108	0.8	50.1
PR_EVALUATION\EVAL_CRITER\WRITING&PRESENT	522	0.1056	0.0075	0.0041	95	0.7037	79.7
PR_EVALUATION\EVAL_CRITER\THEORY	81	0.0164	0.0012	0.0006	33	0.2444	49.6
PR_EVALUATION\EVAL_CRITER\RELEVANCE	714	0.1445	0.0103	0.0056	113	0.837	55.2
PR_EVALUATION\EVAL_CRITER\REF_LITER	518	0.1048	0.0074	0.004	93	0.6889	83.8
PR_EVALUATION\EVAL_CRITER\METHOD&STAT	149	0.0301	0.0021	0.0012	58	0.4296	54.7
PR_EVALUATION\EVAL_CRITER\DESIGN&CONCEP	31	0.0063	0.0004	0.0002	19	0.1407	26.4
PR_EVALUATION\EVAL_CRITER\AUTH_REPUT	9	0.0018	0.0001	0.0001	7	0.0519	11.6
PR_ETHICS\TEXT_SIMILAR*	85	0.0172	0.0012	0.0007	35	0.2593	49.8
PR_ETHICS\RES_MISCONDUCT	70	0.0142	0.001	0.0005	25	0.1852	51.3
PR_ETHICS\ETH_GUID	64	0.013	0.0009	0.0005	28	0.2074	43.7
PR_ETHICS\EDI	111	0.0225	0.0016	0.0009	30	0.2222	72.5
PR_ETHICS\CONFIDENT	16	0.0032	0.0002	0.0001	9	0.0667	18.8
PR_ETHICS\COI	132	0.0267	0.0019	0.001	43	0.3185	65.6

## Sheet: Cat 4the level
	FREQUENCY	% SHOWN	% PROCESSED	% TOTAL	NO. CASES	% CASES	TF • IDF
PR_PROCESS\REVIEWER\OBJECTIVITY	58	0.0117	0.0008	0.0005	31	0.2296	37.1
PR_PROCESS\REVIEWER\NUMBER\TWO	34	0.0069	0.0005	0.0003	24	0.1778	25.5
PR_PROCESS\REVIEWER\NUMBER\THREE_OR_MORE	20	0.004	0.0003	0.0002	15	0.1111	19.1
PR_PROCESS\REVIEWER\NUMBER\ONE	11	0.0022	0.0002	0.0001	8	0.0593	13.5
PR_PROCESS\REVIEWER\INDEPEND	116	0.0235	0.0017	0.0009	65	0.4815	36.8
PR_PROCESS\REVIEWER\COMPETENCE	98	0.0198	0.0014	0.0008	51	0.3778	41.4
PR_PROCESS\ID_TRANSP\VISIBLE	1	0.0002	0	0	1	0.0074	2.1
PR_PROCESS\ID_TRANSP\ANONYM\TRIPLE_ANON	1	0.0002	0	0	1	0.0074	2.1
PR_PROCESS\ID_TRANSP\ANONYM\SINGLE_ANON	30	0.0061	0.0004	0.0002	21	0.1556	24.2
PR_PROCESS\ID_TRANSP\ANONYM\DOUBLE_ANON	75	0.0152	0.0011	0.0006	50	0.3704	32.4
PR_PROCESS\ID_TRANSP\ANONYM\ANON_GEN	225	0.0455	0.0032	0.0018	93	0.6889	36.4
PR_PROCESS\GOVERNANCE\STEER_COMM	23	0.0047	0.0003	0.0002	3	0.0222	38
PR_PROCESS\GOVERNANCE\SCI/ADVISOR_BOARD	59	0.0119	0.0008	0.0005	23	0.1704	45.3
PR_PROCESS\GOVERNANCE\REV_BOARD	1	0.0002	0	0	1	0.0074	2.1
PR_PROCESS\GOVERNANCE\GOVERN_BOARD	10	0.002	0.0001	0.0001	1	0.0074	21.3
PR_PROCESS\GOVERNANCE\ED_BOARD	392	0.0793	0.0056	0.0031	81	0.6	87
PR_PROCESS\GOVERNANCE\EDITOR_IN_CHIEF	136	0.0275	0.002	0.0011	51	0.3778	57.5
PR_EVALUATION\PUBL_TYPE\REV_PAPER\REV_ART	16	0.0032	0.0002	0.0001	14	0.1037	15.7
PR_EVALUATION\PUBL_TYPE\PRE_COMM	42	0.0085	0.0006	0.0003	26	0.1926	30
PR_EVALUATION\PUBL_TYPE\NOTE	53	0.0107	0.0008	0.0004	26	0.1926	37.9
PR_EVALUATION\PUBL_TYPE\EXPERIENCE	10	0.002	0.0001	0.0001	5	0.037	14.3
PR_EVALUATION\PUBL_TYPE\ESSAY	41	0.0083	0.0006	0.0003	19	0.1407	34.9
PR_EVALUATION\PUBL_TYPE\DEBATE	18	0.0036	0.0003	0.0001	13	0.0963	18.3
PR_EVALUATION\PUBL_TYPE\CRIT_DISCUSS	3	0.0006	0	0	2	0.0148	5.5
PR_EVALUATION\PUBL_TYPE\CONF_REV	4	0.0008	0.0001	0	3	0.0222	6.6
PR_EVALUATION\PUBL_TYPE\CONF_PAPER	51	0.0103	0.0007	0.0004	18	0.1333	44.6
PR_EVALUATION\PUBL_TYPE\COMMENT	3	0.0006	0	0	2	0.0148	5.5
PR_EVALUATION\PUBL_TYPE\BOOK_REV	35	0.0071	0.0005	0.0003	26	0.1926	25
PR_EVALUATION\PUBL_TYPE\ARTICLE\SCHO_ART	176	0.0356	0.0025	0.0014	63	0.4667	58.3
PR_EVALUATION\PUBL_TYPE\ARTICLE\PROF_ART	68	0.0138	0.001	0.0005	35	0.2593	39.9
PR_EVALUATION\PR_OUTCOME\REJECT	113	0.0229	0.0016	0.0009	53	0.3926	45.9
PR_EVALUATION\PR_OUTCOME\ACCEPT\REVISION	212	0.0429	0.003	0.0016	76	0.563	52.9
PR_EVALUATION\PR_OUTCOME\ACCEPT	305	0.0617	0.0044	0.0024	86	0.637	59.7
PR_EVALUATION\EVAL_CRITER\WRITING&PRESENT\STRUCT&LAYOUT	368	0.0745	0.0053	0.0029	82	0.6074	79.7
PR_EVALUATION\EVAL_CRITER\WRITING&PRESENT\PUBL_GUID	25	0.0051	0.0004	0.0002	14	0.1037	24.6
PR_EVALUATION\EVAL_CRITER\WRITING&PRESENT\CLARITY	64	0.013	0.0009	0.0005	34	0.2519	38.3
PR_EVALUATION\EVAL_CRITER\WRITING&PRESENT\ACCURACY	32	0.0065	0.0005	0.0002	21	0.1556	25.9
PR_EVALUATION\EVAL_CRITER\WRITING&PRESENT	33	0.0067	0.0005	0.0003	23	0.1704	25.4
PR_EVALUATION\EVAL_CRITER\THEORY	81	0.0164	0.0012	0.0006	33	0.2444	49.6
PR_EVALUATION\EVAL_CRITER\RELEVANCE\SIGNIFICANCE	68	0.0138	0.001	0.0005	37	0.2741	38.2
PR_EVALUATION\EVAL_CRITER\RELEVANCE\ORIGINALITY	522	0.1056	0.0075	0.0041	106	0.7852	54.8
PR_EVALUATION\EVAL_CRITER\RELEVANCE\CONTRIB_PRACT	7	0.0014	0.0001	0.0001	6	0.0444	9.5
PR_EVALUATION\EVAL_CRITER\RELEVANCE\APPROPRIAT	30	0.0061	0.0004	0.0002	20	0.1481	24.9
PR_EVALUATION\EVAL_CRITER\RELEVANCE	87	0.0176	0.0012	0.0007	48	0.3556	39.1
PR_EVALUATION\EVAL_CRITER\REF_LITER	518	0.1048	0.0074	0.004	93	0.6889	83.8
PR_EVALUATION\EVAL_CRITER\METHOD&STAT	149	0.0301	0.0021	0.0012	58	0.4296	54.7
PR_EVALUATION\EVAL_CRITER\DESIGN&CONCEP\REPLICABILITY	6	0.0012	0.0001	0	5	0.037	8.6
PR_EVALUATION\EVAL_CRITER\DESIGN&CONCEP	25	0.0051	0.0004	0.0002	16	0.1185	23.2
PR_EVALUATION\EVAL_CRITER\AUTH_REPUT	9	0.0018	0.0001	0.0001	7	0.0519	11.6
PR_ETHICS\TEXT_SIMILAR*	85	0.0172	0.0012	0.0007	35	0.2593	49.8
PR_ETHICS\RES_MISCONDUCT	70	0.0142	0.001	0.0005	25	0.1852	51.3
PR_ETHICS\ETH_GUID	64	0.013	0.0009	0.0005	28	0.2074	43.7
PR_ETHICS\EDI	111	0.0225	0.0016	0.0009	30	0.2222	72.5
PR_ETHICS\CONFIDENT	16	0.0032	0.0002	0.0001	9	0.0667	18.8
PR_ETHICS\COI	132	0.0267	0.0019	0.001	43	0.3185	65.6

## Sheet: Cat 5th level
	FREQUENCY	% SHOWN	% PROCESSED	% TOTAL	NO. CASES	% CASES	TF • IDF
PR_PROCESS\REVIEWER\OBJECTIVITY	58	0.0117	0.0008	0.0005	31	0.2296	37.1
PR_PROCESS\REVIEWER\NUMBER\TWO	34	0.0069	0.0005	0.0003	24	0.1778	25.5
PR_PROCESS\REVIEWER\NUMBER\THREE_OR_MORE	20	0.004	0.0003	0.0002	15	0.1111	19.1
PR_PROCESS\REVIEWER\NUMBER\ONE	11	0.0022	0.0002	0.0001	8	0.0593	13.5
PR_PROCESS\REVIEWER\INDEPEND	116	0.0235	0.0017	0.0009	65	0.4815	36.8
PR_PROCESS\REVIEWER\COMPETENCE	98	0.0198	0.0014	0.0008	51	0.3778	41.4
PR_PROCESS\ID_TRANSP\VISIBLE	1	0.0002	0	0	1	0.0074	2.1
PR_PROCESS\ID_TRANSP\ANONYM\TRIPLE_ANON	1	0.0002	0	0	1	0.0074	2.1
PR_PROCESS\ID_TRANSP\ANONYM\SINGLE_ANON	30	0.0061	0.0004	0.0002	21	0.1556	24.2
PR_PROCESS\ID_TRANSP\ANONYM\DOUBLE_ANON	75	0.0152	0.0011	0.0006	50	0.3704	32.4
PR_PROCESS\ID_TRANSP\ANONYM\ANON_GEN	225	0.0455	0.0032	0.0018	93	0.6889	36.4
PR_PROCESS\GOVERNANCE\STEER_COMM	23	0.0047	0.0003	0.0002	3	0.0222	38
PR_PROCESS\GOVERNANCE\SCI/ADVISOR_BOARD	59	0.0119	0.0008	0.0005	23	0.1704	45.3
PR_PROCESS\GOVERNANCE\REV_BOARD	1	0.0002	0	0	1	0.0074	2.1
PR_PROCESS\GOVERNANCE\GOVERN_BOARD	10	0.002	0.0001	0.0001	1	0.0074	21.3
PR_PROCESS\GOVERNANCE\ED_BOARD	392	0.0793	0.0056	0.0031	81	0.6	87
PR_PROCESS\GOVERNANCE\EDITOR_IN_CHIEF	136	0.0275	0.002	0.0011	51	0.3778	57.5
PR_EVALUATION\PUBL_TYPE\REV_PAPER\REV_ART	16	0.0032	0.0002	0.0001	14	0.1037	15.7
PR_EVALUATION\PUBL_TYPE\PRE_COMM	42	0.0085	0.0006	0.0003	26	0.1926	30
PR_EVALUATION\PUBL_TYPE\NOTE	53	0.0107	0.0008	0.0004	26	0.1926	37.9
PR_EVALUATION\PUBL_TYPE\EXPERIENCE	10	0.002	0.0001	0.0001	5	0.037	14.3
PR_EVALUATION\PUBL_TYPE\ESSAY	41	0.0083	0.0006	0.0003	19	0.1407	34.9
PR_EVALUATION\PUBL_TYPE\DEBATE	18	0.0036	0.0003	0.0001	13	0.0963	18.3
PR_EVALUATION\PUBL_TYPE\CRIT_DISCUSS	3	0.0006	0	0	2	0.0148	5.5
PR_EVALUATION\PUBL_TYPE\CONF_REV	4	0.0008	0.0001	0	3	0.0222	6.6
PR_EVALUATION\PUBL_TYPE\CONF_PAPER	51	0.0103	0.0007	0.0004	18	0.1333	44.6
PR_EVALUATION\PUBL_TYPE\COMMENT	3	0.0006	0	0	2	0.0148	5.5
PR_EVALUATION\PUBL_TYPE\BOOK_REV	35	0.0071	0.0005	0.0003	26	0.1926	25
PR_EVALUATION\PUBL_TYPE\ARTICLE\SCHO_ART	176	0.0356	0.0025	0.0014	63	0.4667	58.3
PR_EVALUATION\PUBL_TYPE\ARTICLE\PROF_ART	68	0.0138	0.001	0.0005	35	0.2593	39.9
PR_EVALUATION\PR_OUTCOME\REJECT	113	0.0229	0.0016	0.0009	53	0.3926	45.9
PR_EVALUATION\PR_OUTCOME\ACCEPT\REVISION	212	0.0429	0.003	0.0016	76	0.563	52.9
PR_EVALUATION\PR_OUTCOME\ACCEPT	305	0.0617	0.0044	0.0024	86	0.637	59.7
PR_EVALUATION\EVAL_CRITER\WRITING&PRESENT\STRUCT&LAYOUT\TITLE	73	0.0148	0.001	0.0006	26	0.1926	52.2
PR_EVALUATION\EVAL_CRITER\WRITING&PRESENT\STRUCT&LAYOUT\INTRODUCTION	35	0.0071	0.0005	0.0003	20	0.1481	29
PR_EVALUATION\EVAL_CRITER\WRITING&PRESENT\STRUCT&LAYOUT\CONCLUS	78	0.0158	0.0011	0.0006	35	0.2593	45.7
PR_EVALUATION\EVAL_CRITER\WRITING&PRESENT\STRUCT&LAYOUT\ABSTRACT	153	0.031	0.0022	0.0012	61	0.4519	52.8
PR_EVALUATION\EVAL_CRITER\WRITING&PRESENT\STRUCT&LAYOUT	29	0.0059	0.0004	0.0002	20	0.1481	24
PR_EVALUATION\EVAL_CRITER\WRITING&PRESENT\PUBL_GUID	25	0.0051	0.0004	0.0002	14	0.1037	24.6
PR_EVALUATION\EVAL_CRITER\WRITING&PRESENT\CLARITY	64	0.013	0.0009	0.0005	34	0.2519	38.3
PR_EVALUATION\EVAL_CRITER\WRITING&PRESENT\ACCURACY	32	0.0065	0.0005	0.0002	21	0.1556	25.9
PR_EVALUATION\EVAL_CRITER\WRITING&PRESENT	33	0.0067	0.0005	0.0003	23	0.1704	25.4
PR_EVALUATION\EVAL_CRITER\THEORY	81	0.0164	0.0012	0.0006	33	0.2444	49.6
PR_EVALUATION\EVAL_CRITER\RELEVANCE\SIGNIFICANCE	68	0.0138	0.001	0.0005	37	0.2741	38.2
PR_EVALUATION\EVAL_CRITER\RELEVANCE\ORIGINALITY	522	0.1056	0.0075	0.0041	106	0.7852	54.8
PR_EVALUATION\EVAL_CRITER\RELEVANCE\CONTRIB_PRACT	7	0.0014	0.0001	0.0001	6	0.0444	9.5
PR_EVALUATION\EVAL_CRITER\RELEVANCE\APPROPRIAT	30	0.0061	0.0004	0.0002	20	0.1481	24.9
PR_EVALUATION\EVAL_CRITER\RELEVANCE	87	0.0176	0.0012	0.0007	48	0.3556	39.1
PR_EVALUATION\EVAL_CRITER\REF_LITER	518	0.1048	0.0074	0.004	93	0.6889	83.8
PR_EVALUATION\EVAL_CRITER\METHOD&STAT	149	0.0301	0.0021	0.0012	58	0.4296	54.7
PR_EVALUATION\EVAL_CRITER\DESIGN&CONCEP\REPLICABILITY	6	0.0012	0.0001	0	5	0.037	8.6
PR_EVALUATION\EVAL_CRITER\DESIGN&CONCEP	25	0.0051	0.0004	0.0002	16	0.1185	23.2
PR_EVALUATION\EVAL_CRITER\AUTH_REPUT	9	0.0018	0.0001	0.0001	7	0.0519	11.6
PR_ETHICS\TEXT_SIMILAR*	85	0.0172	0.0012	0.0007	35	0.2593	49.8
PR_ETHICS\RES_MISCONDUCT	70	0.0142	0.001	0.0005	25	0.1852	51.3
PR_ETHICS\ETH_GUID	64	0.013	0.0009	0.0005	28	0.2074	43.7
PR_ETHICS\EDI	111	0.0225	0.0016	0.0009	30	0.2222	72.5
PR_ETHICS\CONFIDENT	16	0.0032	0.0002	0.0001	9	0.0667	18.8
PR_ETHICS\COI	132	0.0267	0.0019	0.001	43	0.3185	65.6

## Sheet: All keywords
	FREQUENCY	% SHOWN	% PROCESSED	% TOTAL	NO. CASES	% CASES	TF • IDF
PR_PROCESS\REVIEWER\OBJECTIVITY\OBJETIV*	11	0.0022	0.0002	0.0001	3	0.0222	18.2
PR_PROCESS\REVIEWER\OBJECTIVITY\OBJEKTIV*	3	0.0006	0	0	2	0.0148	5.5
PR_PROCESS\REVIEWER\OBJECTIVITY\OBJECTIV*	32	0.0065	0.0005	0.0002	18	0.1333	28
PR_PROCESS\REVIEWER\OBJECTIVITY\OBIETTIV*	12	0.0024	0.0002	0.0001	9	0.0667	14.1
PR_PROCESS\REVIEWER\NUMBER\TWO\TWO_RE*	9	0.0018	0.0001	0.0001	8	0.0593	11
PR_PROCESS\REVIEWER\NUMBER\TWO\TWO_*_RE*	18	0.0036	0.0003	0.0001	15	0.1111	17.2
PR_PROCESS\REVIEWER\NUMBER\TWO\DVA*_RE*	2	0.0004	0	0	2	0.0148	3.7
PR_PROCESS\REVIEWER\NUMBER\TWO\DRUG?_RE*	1	0.0002	0	0	1	0.0074	2.1
PR_PROCESS\REVIEWER\NUMBER\TWO\DOS_EV*	4	0.0008	0.0001	0	4	0.0296	6.1
PR_PROCESS\REVIEWER\NUMBER\THREE_OR_MORE\TREĆ*_RE*	1	0.0002	0	0	1	0.0074	2.1
PR_PROCESS\REVIEWER\NUMBER\THREE_OR_MORE\THREE_RE*	1	0.0002	0	0	1	0.0074	2.1
PR_PROCESS\REVIEWER\NUMBER\THREE_OR_MORE\THIRD_RE*	7	0.0014	0.0001	0.0001	7	0.0519	9
PR_PROCESS\REVIEWER\NUMBER\THREE_OR_MORE\TERC*	11	0.0022	0.0002	0.0001	6	0.0444	14.9
PR_PROCESS\REVIEWER\NUMBER\ONE\PRV?_RE*	1	0.0002	0	0	1	0.0074	2.1
PR_PROCESS\REVIEWER\NUMBER\ONE\ONE_REV*	1	0.0002	0	0	1	0.0074	2.1
PR_PROCESS\REVIEWER\NUMBER\ONE\ONE_*_RE*	3	0.0006	0	0	2	0.0148	5.5
PR_PROCESS\REVIEWER\NUMBER\ONE\FIRST_REV*	6	0.0012	0.0001	0	5	0.037	8.6
PR_PROCESS\REVIEWER\INDEPEND\VANJSK*	5	0.001	0.0001	0	5	0.037	7.2
PR_PROCESS\REVIEWER\INDEPEND\NEZAVIS*	1	0.0002	0	0	1	0.0074	2.1
PR_PROCESS\REVIEWER\INDEPEND\IND?PEND*	37	0.0075	0.0005	0.0003	28	0.2074	25.3
PR_PROCESS\REVIEWER\INDEPEND\E?TERN*	73	0.0148	0.001	0.0006	45	0.3333	34.8
PR_PROCESS\REVIEWER\COMPETENCE\STRUČNJ*	1	0.0002	0	0	1	0.0074	2.1
PR_PROCESS\REVIEWER\COMPETENCE\FAMA	1	0.0002	0	0	1	0.0074	2.1
PR_PROCESS\REVIEWER\COMPETENCE\EXPERT*	62	0.0125	0.0009	0.0005	33	0.2444	37.9
PR_PROCESS\REVIEWER\COMPETENCE\EKSPERT*	2	0.0004	0	0	2	0.0148	3.7
PR_PROCESS\REVIEWER\COMPETENCE\E?PERTI?E	3	0.0006	0	0	3	0.0222	5
PR_PROCESS\REVIEWER\COMPETENCE\COMPETEN*	29	0.0059	0.0004	0.0002	23	0.1704	22.3
PR_PROCESS\ID_TRANSP\VISIBLE\OPEN_PEER_REV*	1	0.0002	0	0	1	0.0074	2.1
PR_PROCESS\ID_TRANSP\ANONYM\TRIPLE_ANON\TRIPLE	1	0.0002	0	0	1	0.0074	2.1
PR_PROCESS\ID_TRANSP\ANONYM\SINGLE_ANON\SINGOL*	10	0.002	0.0001	0.0001	8	0.0593	12.3
PR_PROCESS\ID_TRANSP\ANONYM\SINGLE_ANON\SINGLE	10	0.002	0.0001	0.0001	7	0.0519	12.9
PR_PROCESS\ID_TRANSP\ANONYM\SINGLE_ANON\SIMPLE	6	0.0012	0.0001	0	5	0.037	8.6
PR_PROCESS\ID_TRANSP\ANONYM\SINGLE_ANON\JEDNOSTRUK*	4	0.0008	0.0001	0	3	0.0222	6.6
PR_PROCESS\ID_TRANSP\ANONYM\DOUBLE_ANON\DVOSTRUK*	16	0.0032	0.0002	0.0001	9	0.0667	18.8
PR_PROCESS\ID_TRANSP\ANONYM\DOUBLE_ANON\DOUBLE	40	0.0081	0.0006	0.0003	29	0.2148	26.7
PR_PROCESS\ID_TRANSP\ANONYM\DOUBLE_ANON\DOBLE	19	0.0038	0.0003	0.0001	13	0.0963	19.3
PR_PROCESS\ID_TRANSP\ANONYM\ANON_GEN\CONCEAL*	1	0.0002	0	0	1	0.0074	2.1
PR_PROCESS\ID_TRANSP\ANONYM\ANON_GEN\CIEG*	12	0.0024	0.0002	0.0001	11	0.0815	13.1
PR_PROCESS\ID_TRANSP\ANONYM\ANON_GEN\CIEC*	13	0.0026	0.0002	0.0001	11	0.0815	14.2
PR_PROCESS\ID_TRANSP\ANONYM\ANON_GEN\BLIND*	48	0.0097	0.0007	0.0004	31	0.2296	30.7
PR_PROCESS\ID_TRANSP\ANONYM\ANON_GEN\AN?N*	151	0.0306	0.0022	0.0012	80	0.5926	34.3
PR_PROCESS\GOVERNANCE\STEER_COMM\STEERING_COMMIT*	17	0.0034	0.0002	0.0001	2	0.0148	31.1
PR_PROCESS\GOVERNANCE\STEER_COMM\COMIT*_DIRE*	6	0.0012	0.0001	0	1	0.0074	12.8
PR_PROCESS\GOVERNANCE\SCI/ADVISOR_BOARD\SCIENTIF*_BOARD*	1	0.0002	0	0	1	0.0074	2.1
PR_PROCESS\GOVERNANCE\SCI/ADVISOR_BOARD\CONSE*_ASESOR*	6	0.0012	0.0001	0	3	0.0222	9.9
PR_PROCESS\GOVERNANCE\SCI/ADVISOR_BOARD\COMIT*_SCIENT*	33	0.0067	0.0005	0.0003	9	0.0667	38.8
PR_PROCESS\GOVERNANCE\SCI/ADVISOR_BOARD\ADVISOR*_BOARD*	19	0.0038	0.0003	0.0001	10	0.0741	21.5
PR_PROCESS\GOVERNANCE\REV_BOARD\REVIEW*_BOARD*	1	0.0002	0	0	1	0.0074	2.1
PR_PROCESS\GOVERNANCE\GOVERN_BOARD\GOVERN*_BOARD*	10	0.002	0.0001	0.0001	1	0.0074	21.3
PR_PROCESS\GOVERNANCE\ED_BOARD\UREDNIČK*_ODB*	1	0.0002	0	0	1	0.0074	2.1
PR_PROCESS\GOVERNANCE\ED_BOARD\UREDNIŠT*	123	0.0249	0.0018	0.001	17	0.1259	110.7
PR_PROCESS\GOVERNANCE\ED_BOARD\REDACT*_BOARD*	1	0.0002	0	0	1	0.0074	2.1
PR_PROCESS\GOVERNANCE\ED_BOARD\EDITOR*_BOARD*	207	0.0419	0.003	0.0016	49	0.363	91.1
PR_PROCESS\GOVERNANCE\ED_BOARD\CONSE*_EDITOR*	4	0.0008	0.0001	0	3	0.0222	6.6
PR_PROCESS\GOVERNANCE\ED_BOARD\CONSE*_*_REDACC*	39	0.0079	0.0006	0.0003	9	0.0667	45.9
PR_PROCESS\GOVERNANCE\ED_BOARD\COMIT*_EDITO*	17	0.0034	0.0002	0.0001	6	0.0444	23
PR_PROCESS\GOVERNANCE\EDITOR_IN_CHIEF\GLAVNI_UREDNIK	7	0.0014	0.0001	0.0001	6	0.0444	9.5
PR_PROCESS\GOVERNANCE\EDITOR_IN_CHIEF\EDITOR_IN_CHIEF	8	0.0016	0.0001	0.0001	5	0.037	11.5
PR_PROCESS\GOVERNANCE\EDITOR_IN_CHIEF\EDITOR-IN-CHIEF	36	0.0073	0.0005	0.0003	6	0.0444	48.7
PR_PROCESS\GOVERNANCE\EDITOR_IN_CHIEF\DIRETTORE	57	0.0115	0.0008	0.0004	16	0.1185	52.8
PR_PROCESS\GOVERNANCE\EDITOR_IN_CHIEF\DIRECTOR*	27	0.0055	0.0004	0.0002	21	0.1556	21.8
PR_PROCESS\GOVERNANCE\EDITOR_IN_CHIEF\CHIEF_EDITOR	1	0.0002	0	0	1	0.0074	2.1
PR_EVALUATION\PUBL_TYPE\REV_PAPER\REV_ART\REV*_PAPER*	4	0.0008	0.0001	0	4	0.0296	6.1
PR_EVALUATION\PUBL_TYPE\REV_PAPER\REV_ART\REV*_ART*	5	0.001	0.0001	0	5	0.037	7.2
PR_EVALUATION\PUBL_TYPE\REV_PAPER\REV_ART\ART?C*_*_REV*	7	0.0014	0.0001	0.0001	5	0.037	10
PR_EVALUATION\PUBL_TYPE\PRE_COMM\PRETH*_PRIOP*	12	0.0024	0.0002	0.0001	9	0.0667	14.1
PR_EVALUATION\PUBL_TYPE\PRE_COMM\PRELIMINA*_REPORT*	5	0.001	0.0001	0	2	0.0148	9.1
PR_EVALUATION\PUBL_TYPE\PRE_COMM\PRELIMINA*_COMMUN*	25	0.0051	0.0004	0.0002	19	0.1407	21.3
PR_EVALUATION\PUBL_TYPE\NOTE\TECHNIC*_NOTE?	4	0.0008	0.0001	0	2	0.0148	7.3
PR_EVALUATION\PUBL_TYPE\NOTE\NOTAS*_*_LEGISL*	2	0.0004	0	0	2	0.0148	3.7
PR_EVALUATION\PUBL_TYPE\NOTE\NOT*_*_SENTENZ*	9	0.0018	0.0001	0.0001	6	0.0444	12.2
PR_EVALUATION\PUBL_TYPE\NOTE\DOTTRINA	9	0.0018	0.0001	0.0001	6	0.0444	12.2
PR_EVALUATION\PUBL_TYPE\NOTE\DOCTRIN*	16	0.0032	0.0002	0.0001	9	0.0667	18.8
PR_EVALUATION\PUBL_TYPE\NOTE\CRÓNICA*	6	0.0012	0.0001	0	4	0.0296	9.2
PR_EVALUATION\PUBL_TYPE\NOTE\CRONACHE*	4	0.0008	0.0001	0	2	0.0148	7.3
PR_EVALUATION\PUBL_TYPE\NOTE\CASE_NOTE?	3	0.0006	0	0	2	0.0148	5.5
PR_EVALUATION\PUBL_TYPE\EXPERIENCE\EXPERIENCES	10	0.002	0.0001	0.0001	5	0.037	14.3
PR_EVALUATION\PUBL_TYPE\ESSAY\SAGG*	11	0.0022	0.0002	0.0001	6	0.0444	14.9
PR_EVALUATION\PUBL_TYPE\ESSAY\ESSAY*	23	0.0047	0.0003	0.0002	11	0.0815	25
PR_EVALUATION\PUBL_TYPE\ESSAY\ESEJ*	2	0.0004	0	0	2	0.0148	3.7
PR_EVALUATION\PUBL_TYPE\ESSAY\ENSAYO*	5	0.001	0.0001	0	1	0.0074	10.7
PR_EVALUATION\PUBL_TYPE\DEBATE\DISCUSSIONE	1	0.0002	0	0	1	0.0074	2.1
PR_EVALUATION\PUBL_TYPE\DEBATE\DEBAT*	17	0.0034	0.0002	0.0001	12	0.0889	17.9
PR_EVALUATION\PUBL_TYPE\CRIT_DISCUSS\CRIT*_DISCUS*	3	0.0006	0	0	2	0.0148	5.5
PR_EVALUATION\PUBL_TYPE\CONF_REV\PRIKAZ*_SKUP*	1	0.0002	0	0	1	0.0074	2.1
PR_EVALUATION\PUBL_TYPE\CONF_REV\PRIKAZ*_KONF*	1	0.0002	0	0	1	0.0074	2.1
PR_EVALUATION\PUBL_TYPE\CONF_REV\CONFER*_REVIEW*	2	0.0004	0	0	1	0.0074	4.3
PR_EVALUATION\PUBL_TYPE\CONF_PAPER\KONF*	8	0.0016	0.0001	0.0001	4	0.0296	12.2
PR_EVALUATION\PUBL_TYPE\CONF_PAPER\CONFERENCE*	43	0.0087	0.0006	0.0003	15	0.1111	41
PR_EVALUATION\PUBL_TYPE\COMMENT\@COMMENT	3	0.0006	0	0	2	0.0148	5.5
PR_EVALUATION\PUBL_TYPE\BOOK_REV\RECENZ*_KNJIG*	2	0.0004	0	0	2	0.0148	3.7
PR_EVALUATION\PUBL_TYPE\BOOK_REV\PRIKAZ*_KNJIG*	8	0.0016	0.0001	0.0001	6	0.0444	10.8
PR_EVALUATION\PUBL_TYPE\BOOK_REV\BOOK_REVIEW*	25	0.0051	0.0004	0.0002	20	0.1481	20.7
PR_EVALUATION\PUBL_TYPE\ARTICLE\SCHO_ART\ZNANSTVEN*_ČLAN*	20	0.004	0.0003	0.0002	8	0.0593	24.5
PR_EVALUATION\PUBL_TYPE\ARTICLE\SCHO_ART\ZNANSTVEN*_RAD*	19	0.0038	0.0003	0.0001	12	0.0889	20
PR_EVALUATION\PUBL_TYPE\ARTICLE\SCHO_ART\ISTRAŽ*_RAD*	1	0.0002	0	0	1	0.0074	2.1
PR_EVALUATION\PUBL_TYPE\ARTICLE\SCHO_ART\CONTRIBUT*_SCIENTIF*	7	0.0014	0.0001	0.0001	5	0.037	10
PR_EVALUATION\PUBL_TYPE\ARTICLE\SCHO_ART\@SCI_ART	101	0.0204	0.0015	0.0008	41	0.3037	52.3
PR_EVALUATION\PUBL_TYPE\ARTICLE\SCHO_ART\@SCHOL_ART	3	0.0006	0	0	3	0.0222	5
PR_EVALUATION\PUBL_TYPE\ARTICLE\SCHO_ART\@RES_ART	23	0.0047	0.0003	0.0002	16	0.1185	21.3
PR_EVALUATION\PUBL_TYPE\ARTICLE\SCHO_ART\@ACAD_ART	2	0.0004	0	0	2	0.0148	3.7
PR_EVALUATION\PUBL_TYPE\ARTICLE\PROF_ART\STRUČN*_ČLAN*	13	0.0026	0.0002	0.0001	6	0.0444	17.6
PR_EVALUATION\PUBL_TYPE\ARTICLE\PROF_ART\STRUČN*_RAD*	15	0.003	0.0002	0.0001	9	0.0667	17.6
PR_EVALUATION\PUBL_TYPE\ARTICLE\PROF_ART\@PROF_ART	40	0.0081	0.0006	0.0003	25	0.1852	29.3
PR_EVALUATION\PR_OUTCOME\REJECT\RIFIUT*	7	0.0014	0.0001	0.0001	6	0.0444	9.5
PR_EVALUATION\PR_OUTCOME\REJECT\REJECT*	78	0.0158	0.0011	0.0006	37	0.2741	43.8
PR_EVALUATION\PR_OUTCOME\REJECT\REFUS*	6	0.0012	0.0001	0	5	0.037	8.6
PR_EVALUATION\PR_OUTCOME\REJECT\RECHAZO	10	0.002	0.0001	0.0001	7	0.0519	12.9
PR_EVALUATION\PR_OUTCOME\REJECT\ODBIJ*	3	0.0006	0	0	2	0.0148	5.5
PR_EVALUATION\PR_OUTCOME\REJECT\NOT_ACCEPT*	2	0.0004	0	0	2	0.0148	3.7
PR_EVALUATION\PR_OUTCOME\REJECT\DESFAVORAB*	7	0.0014	0.0001	0.0001	4	0.0296	10.7
PR_EVALUATION\PR_OUTCOME\ACCEPT\REVISION\REVISION*	138	0.0279	0.002	0.0011	47	0.3481	63.2
PR_EVALUATION\PR_OUTCOME\ACCEPT\REVISION\PROMJEN*	6	0.0012	0.0001	0	5	0.037	8.6
PR_EVALUATION\PR_OUTCOME\ACCEPT\REVISION\MODIFICA*	46	0.0093	0.0007	0.0004	29	0.2148	30.7
PR_EVALUATION\PR_OUTCOME\ACCEPT\REVISION\IZMJEN*	13	0.0026	0.0002	0.0001	7	0.0519	16.7
PR_EVALUATION\PR_OUTCOME\ACCEPT\REVISION\ALTERE*	3	0.0006	0	0	3	0.0222	5
PR_EVALUATION\PR_OUTCOME\ACCEPT\REVISION\ALTERA*	6	0.0012	0.0001	0	3	0.0222	9.9
PR_EVALUATION\PR_OUTCOME\ACCEPT\PRIHVA*	40	0.0081	0.0006	0.0003	13	0.0963	40.7
PR_EVALUATION\PR_OUTCOME\ACCEPT\FAVORAB*	11	0.0022	0.0002	0.0001	5	0.037	15.7
PR_EVALUATION\PR_OUTCOME\ACCEPT\ACCETTA*	29	0.0059	0.0004	0.0002	12	0.0889	30.5
PR_EVALUATION\PR_OUTCOME\ACCEPT\ACCEPT*	225	0.0455	0.0032	0.0018	59	0.437	80.9
PR_EVALUATION\EVAL_CRITER\WRITING&PRESENT\STRUCT&LAYOUT\TITLE\@TITLE	73	0.0148	0.001	0.0006	26	0.1926	52.2
PR_EVALUATION\EVAL_CRITER\WRITING&PRESENT\STRUCT&LAYOUT\STRUCTURE*	24	0.0049	0.0003	0.0002	16	0.1185	22.2
PR_EVALUATION\EVAL_CRITER\WRITING&PRESENT\STRUCT&LAYOUT\LAYOUT	5	0.001	0.0001	0	5	0.037	7.2
PR_EVALUATION\EVAL_CRITER\WRITING&PRESENT\STRUCT&LAYOUT\INTRODUCTION\UVOD	3	0.0006	0	0	1	0.0074	6.4
PR_EVALUATION\EVAL_CRITER\WRITING&PRESENT\STRUCT&LAYOUT\INTRODUCTION\INTRODUZION*	2	0.0004	0	0	2	0.0148	3.7
PR_EVALUATION\EVAL_CRITER\WRITING&PRESENT\STRUCT&LAYOUT\INTRODUCTION\INTRODUCTION	21	0.0042	0.0003	0.0002	13	0.0963	21.3
PR_EVALUATION\EVAL_CRITER\WRITING&PRESENT\STRUCT&LAYOUT\INTRODUCTION\INTRODUCCI*	9	0.0018	0.0001	0.0001	5	0.037	12.9
PR_EVALUATION\EVAL_CRITER\WRITING&PRESENT\STRUCT&LAYOUT\CONCLUS\ZAKLJUČ*	21	0.0042	0.0003	0.0002	6	0.0444	28.4
PR_EVALUATION\EVAL_CRITER\WRITING&PRESENT\STRUCT&LAYOUT\CONCLUS\CONCLUS*	57	0.0115	0.0008	0.0004	31	0.2296	36.4
PR_EVALUATION\EVAL_CRITER\WRITING&PRESENT\STRUCT&LAYOUT\ABSTRACT\SUMMARY	28	0.0057	0.0004	0.0002	16	0.1185	25.9
PR_EVALUATION\EVAL_CRITER\WRITING&PRESENT\STRUCT&LAYOUT\ABSTRACT\SAŽETAK	28	0.0057	0.0004	0.0002	9	0.0667	32.9
PR_EVALUATION\EVAL_CRITER\WRITING&PRESENT\STRUCT&LAYOUT\ABSTRACT\RIASSUNT*	1	0.0002	0	0	1	0.0074	2.1
PR_EVALUATION\EVAL_CRITER\WRITING&PRESENT\STRUCT&LAYOUT\ABSTRACT\RESUMEN*	21	0.0042	0.0003	0.0002	10	0.0741	23.7
PR_EVALUATION\EVAL_CRITER\WRITING&PRESENT\STRUCT&LAYOUT\ABSTRACT\ESTRATT*	4	0.0008	0.0001	0	3	0.0222	6.6
PR_EVALUATION\EVAL_CRITER\WRITING&PRESENT\STRUCT&LAYOUT\ABSTRACT\ABSTRACT	71	0.0144	0.001	0.0006	37	0.2741	39.9
PR_EVALUATION\EVAL_CRITER\WRITING&PRESENT\PUBL_GUID\EUROPEAN_ASSOCIATION_OF_SCIENCE_EDITORS	5	0.001	0.0001	0	5	0.037	7.2
PR_EVALUATION\EVAL_CRITER\WRITING&PRESENT\PUBL_GUID\EASE	10	0.002	0.0001	0.0001	7	0.0519	12.9
PR_EVALUATION\EVAL_CRITER\WRITING&PRESENT\PUBL_GUID\BEST_PRACTICE_GUIDELINES_FOR_JOURNAL_EDITORS	9	0.0018	0.0001	0.0001	7	0.0519	11.6
PR_EVALUATION\EVAL_CRITER\WRITING&PRESENT\PUBL_GUID\@PUB_GUID	1	0.0002	0	0	1	0.0074	2.1
PR_EVALUATION\EVAL_CRITER\WRITING&PRESENT\PRESENTAZIONE	1	0.0002	0	0	1	0.0074	2.1
PR_EVALUATION\EVAL_CRITER\WRITING&PRESENT\PRESENTATION	22	0.0045	0.0003	0.0002	15	0.1111	21
PR_EVALUATION\EVAL_CRITER\WRITING&PRESENT\PRESENTACIÓN	5	0.001	0.0001	0	4	0.0296	7.6
PR_EVALUATION\EVAL_CRITER\WRITING&PRESENT\CLARITY\JASN*	6	0.0012	0.0001	0	3	0.0222	9.9
PR_EVALUATION\EVAL_CRITER\WRITING&PRESENT\CLARITY\CLEAR	29	0.0059	0.0004	0.0002	19	0.1407	24.7
PR_EVALUATION\EVAL_CRITER\WRITING&PRESENT\CLARITY\CLARITY	11	0.0022	0.0002	0.0001	9	0.0667	12.9
PR_EVALUATION\EVAL_CRITER\WRITING&PRESENT\CLARITY\CLARIDAD	5	0.001	0.0001	0	4	0.0296	7.6
PR_EVALUATION\EVAL_CRITER\WRITING&PRESENT\CLARITY\CHIAREZZA	13	0.0026	0.0002	0.0001	9	0.0667	15.3
PR_EVALUATION\EVAL_CRITER\WRITING&PRESENT\ACCURACY\TOČN*	6	0.0012	0.0001	0	3	0.0222	9.9
PR_EVALUATION\EVAL_CRITER\WRITING&PRESENT\ACCURACY\PRECIS*	9	0.0018	0.0001	0.0001	8	0.0593	11
PR_EVALUATION\EVAL_CRITER\WRITING&PRESENT\ACCURACY\ACCURA*	15	0.003	0.0002	0.0001	13	0.0963	15.2
PR_EVALUATION\EVAL_CRITER\WRITING&PRESENT\ACCURACY\@COMPL_BIBL	2	0.0004	0	0	2	0.0148	3.7
PR_EVALUATION\EVAL_CRITER\WRITING&PRESENT\@WRI_STYLE	5	0.001	0.0001	0	5	0.037	7.2
PR_EVALUATION\EVAL_CRITER\THEORY\THEOR*	52	0.0105	0.0007	0.0004	26	0.1926	37.2
PR_EVALUATION\EVAL_CRITER\THEORY\TEORIJ*	29	0.0059	0.0004	0.0002	10	0.0741	32.8
PR_EVALUATION\EVAL_CRITER\RELEVANCE\VAŽNOST*	1	0.0002	0	0	1	0.0074	2.1
PR_EVALUATION\EVAL_CRITER\RELEVANCE\SIGNIFICANCE\SIGNIFIC*	68	0.0138	0.001	0.0005	37	0.2741	38.2
PR_EVALUATION\EVAL_CRITER\RELEVANCE\R?LEVAN*	21	0.0042	0.0003	0.0002	12	0.0889	22.1
PR_EVALUATION\EVAL_CRITER\RELEVANCE\PERTINEN*	17	0.0034	0.0002	0.0001	9	0.0667	20
PR_EVALUATION\EVAL_CRITER\RELEVANCE\ORIGINALITY\UNPUBLISHED	48	0.0097	0.0007	0.0004	29	0.2148	32.1
PR_EVALUATION\EVAL_CRITER\RELEVANCE\ORIGINALITY\ORIGINAL*	336	0.068	0.0048	0.0026	93	0.6889	54.4
PR_EVALUATION\EVAL_CRITER\RELEVANCE\ORIGINALITY\NOVIT?	3	0.0006	0	0	3	0.0222	5
PR_EVALUATION\EVAL_CRITER\RELEVANCE\ORIGINALITY\NOVELTY	1	0.0002	0	0	1	0.0074	2.1
PR_EVALUATION\EVAL_CRITER\RELEVANCE\ORIGINALITY\NOV?	7	0.0014	0.0001	0.0001	6	0.0444	9.5
PR_EVALUATION\EVAL_CRITER\RELEVANCE\ORIGINALITY\NEOBJAVLJEN*	15	0.003	0.0002	0.0001	9	0.0667	17.6
PR_EVALUATION\EVAL_CRITER\RELEVANCE\ORIGINALITY\IZVORN*	43	0.0087	0.0006	0.0003	12	0.0889	45.2
PR_EVALUATION\EVAL_CRITER\RELEVANCE\ORIGINALITY\INNOVATIV*	4	0.0008	0.0001	0	4	0.0296	6.1
PR_EVALUATION\EVAL_CRITER\RELEVANCE\ORIGINALITY\ESCLUSIV*_OPER*	2	0.0004	0	0	2	0.0148	3.7
PR_EVALUATION\EVAL_CRITER\RELEVANCE\ORIGINALITY\@NOT_PUBLISH	48	0.0097	0.0007	0.0004	33	0.2444	29.4
PR_EVALUATION\EVAL_CRITER\RELEVANCE\ORIGINALITY\@NON_PUBBLIC	10	0.002	0.0001	0.0001	8	0.0593	12.3
PR_EVALUATION\EVAL_CRITER\RELEVANCE\ORIGINALITY\@NIJE_OBJAV	5	0.001	0.0001	0	5	0.037	7.2
PR_EVALUATION\EVAL_CRITER\RELEVANCE\IMPORTAN*	48	0.0097	0.0007	0.0004	33	0.2444	29.4
PR_EVALUATION\EVAL_CRITER\RELEVANCE\CONTRIB_PRACT\@CONTR_PRACT	7	0.0014	0.0001	0.0001	6	0.0444	9.5
PR_EVALUATION\EVAL_CRITER\RELEVANCE\APPROPRIAT\PRIMJERENO*	6	0.0012	0.0001	0	4	0.0296	9.2
PR_EVALUATION\EVAL_CRITER\RELEVANCE\APPROPRIAT\APPROPRIAT*	11	0.0022	0.0002	0.0001	9	0.0667	12.9
PR_EVALUATION\EVAL_CRITER\RELEVANCE\APPROPRIAT\ADEQUACY	8	0.0016	0.0001	0.0001	5	0.037	11.5
PR_EVALUATION\EVAL_CRITER\RELEVANCE\APPROPRIAT\ADEGUATEZZ*	5	0.001	0.0001	0	3	0.0222	8.3
PR_EVALUATION\EVAL_CRITER\REF_LITER\RIFERIMENT*	22	0.0045	0.0003	0.0002	12	0.0889	23.1
PR_EVALUATION\EVAL_CRITER\REF_LITER\REFERENC*	282	0.0571	0.0041	0.0022	62	0.4593	95.3
PR_EVALUATION\EVAL_CRITER\REF_LITER\LITERATUR*	82	0.0166	0.0012	0.0006	29	0.2148	54.8
PR_EVALUATION\EVAL_CRITER\REF_LITER\L?TTERATURA	2	0.0004	0	0	2	0.0148	3.7
PR_EVALUATION\EVAL_CRITER\REF_LITER\BIBLIOGRAPH*	87	0.0176	0.0012	0.0007	32	0.237	54.4
PR_EVALUATION\EVAL_CRITER\REF_LITER\BIBLIOGR?FI*	43	0.0087	0.0006	0.0003	24	0.1778	32.3
PR_EVALUATION\EVAL_CRITER\METHOD&STAT\STATISTIC*	5	0.001	0.0001	0	5	0.037	7.2
PR_EVALUATION\EVAL_CRITER\METHOD&STAT\METHOD*	80	0.0162	0.0011	0.0006	28	0.2074	54.7
PR_EVALUATION\EVAL_CRITER\METHOD&STAT\M?TOD*	63	0.0127	0.0009	0.0005	31	0.2296	40.3
PR_EVALUATION\EVAL_CRITER\METHOD&STAT\DATA_ANAL*	1	0.0002	0	0	1	0.0074	2.1
PR_EVALUATION\EVAL_CRITER\DESIGN&CONCEP\SAMPL*	2	0.0004	0	0	2	0.0148	3.7
PR_EVALUATION\EVAL_CRITER\DESIGN&CONCEP\REPLICABILITY\REPLICA*	6	0.0012	0.0001	0	5	0.037	8.6
PR_EVALUATION\EVAL_CRITER\DESIGN&CONCEP\PROGETT*_*_RICERC*	1	0.0002	0	0	1	0.0074	2.1
PR_EVALUATION\EVAL_CRITER\DESIGN&CONCEP\DATA_COLLECT*	2	0.0004	0	0	2	0.0148	3.7
PR_EVALUATION\EVAL_CRITER\DESIGN&CONCEP\CONCEPT*	19	0.0038	0.0003	0.0001	13	0.0963	19.3
PR_EVALUATION\EVAL_CRITER\DESIGN&CONCEP\@RES_DES	1	0.0002	0	0	1	0.0074	2.1
PR_EVALUATION\EVAL_CRITER\AUTH_REPUT\@AUTH_REPUT	9	0.0018	0.0001	0.0001	7	0.0519	11.6
PR_ETHICS\TEXT_SIMILAR*\SOMIGLIAN*	6	0.0012	0.0001	0	6	0.0444	8.1
PR_ETHICS\TEXT_SIMILAR*\SIMILITUD*	2	0.0004	0	0	2	0.0148	3.7
PR_ETHICS\TEXT_SIMILAR*\SIMILARIT*	14	0.0028	0.0002	0.0001	8	0.0593	17.2
PR_ETHICS\TEXT_SIMILAR*\SELF-PLAGIA*	6	0.0012	0.0001	0	4	0.0296	9.2
PR_ETHICS\TEXT_SIMILAR*\RECYCL*	1	0.0002	0	0	1	0.0074	2.1
PR_ETHICS\TEXT_SIMILAR*\PLAGIA*	56	0.0113	0.0008	0.0004	29	0.2148	37.4
PR_ETHICS\RES_MISCONDUCT\MISCOND*	16	0.0032	0.0002	0.0001	6	0.0444	21.6
PR_ETHICS\RES_MISCONDUCT\MANIPULA*	7	0.0014	0.0001	0.0001	3	0.0222	11.6
PR_ETHICS\RES_MISCONDUCT\MALPRACTI*	7	0.0014	0.0001	0.0001	5	0.037	10
PR_ETHICS\RES_MISCONDUCT\MALA*_PRÁCTIC*	4	0.0008	0.0001	0	1	0.0074	8.5
PR_ETHICS\RES_MISCONDUCT\MAL*A_CONDUCT*	3	0.0006	0	0	2	0.0148	5.5
PR_ETHICS\RES_MISCONDUCT\IMPARCIAL	2	0.0004	0	0	1	0.0074	4.3
PR_ETHICS\RES_MISCONDUCT\FRAUD*	20	0.004	0.0003	0.0002	12	0.0889	21
PR_ETHICS\RES_MISCONDUCT\FALSIFIC*	8	0.0016	0.0001	0.0001	7	0.0519	10.3
PR_ETHICS\RES_MISCONDUCT\FABRICAT*	2	0.0004	0	0	2	0.0148	3.7
PR_ETHICS\RES_MISCONDUCT\CATTIVA_CONDOTTA	1	0.0002	0	0	1	0.0074	2.1
PR_ETHICS\ETH_GUID\PROMOTING_INTEGRITY_IN_SCIENTIFIC_JOURNAL*	1	0.0002	0	0	1	0.0074	2.1
PR_ETHICS\ETH_GUID\ICMJE	1	0.0002	0	0	1	0.0074	2.1
PR_ETHICS\ETH_GUID\COPE	38	0.0077	0.0005	0.0003	26	0.1926	27.2
PR_ETHICS\ETH_GUID\COMMITT*_ON_PUBL*_ETH*	24	0.0049	0.0003	0.0002	20	0.1481	19.9
PR_ETHICS\EDI\SEX*	10	0.002	0.0001	0.0001	4	0.0296	15.3
PR_ETHICS\EDI\RELIG*	18	0.0036	0.0003	0.0001	14	0.1037	17.7
PR_ETHICS\EDI\RAZZA	7	0.0014	0.0001	0.0001	7	0.0519	9
PR_ETHICS\EDI\RAZA	2	0.0004	0	0	1	0.0074	4.3
PR_ETHICS\EDI\RAS?	2	0.0004	0	0	2	0.0148	3.7
PR_ETHICS\EDI\RACIAL	1	0.0002	0	0	1	0.0074	2.1
PR_ETHICS\EDI\RACE	1	0.0002	0	0	1	0.0074	2.1
PR_ETHICS\EDI\POLITIC*_POSIT*	1	0.0002	0	0	1	0.0074	2.1
PR_ETHICS\EDI\NARODNOST*	2	0.0004	0	0	1	0.0074	4.3
PR_ETHICS\EDI\INCLUSI?N*	6	0.0012	0.0001	0	6	0.0444	8.1
PR_ETHICS\EDI\IDEOLOG*	3	0.0006	0	0	3	0.0222	5
PR_ETHICS\EDI\GENERE	7	0.0014	0.0001	0.0001	7	0.0519	9
PR_ETHICS\EDI\GENDER	11	0.0022	0.0002	0.0001	4	0.0296	16.8
PR_ETHICS\EDI\G?NERO	1	0.0002	0	0	1	0.0074	2.1
PR_ETHICS\EDI\ETNIČ*	10	0.002	0.0001	0.0001	2	0.0148	18.3
PR_ETHICS\EDI\ETNIC*	9	0.0018	0.0001	0.0001	8	0.0593	11
PR_ETHICS\EDI\ETHNIC*	5	0.001	0.0001	0	4	0.0296	7.6
PR_ETHICS\EDI\EQUIT*	1	0.0002	0	0	1	0.0074	2.1
PR_ETHICS\EDI\DRŽAVLJANSTV*	1	0.0002	0	0	1	0.0074	2.1
PR_ETHICS\EDI\CREED	1	0.0002	0	0	1	0.0074	2.1
PR_ETHICS\EDI\CITTADINAN*	8	0.0016	0.0001	0.0001	8	0.0593	9.8
PR_ETHICS\EDI\CITIZENSHIP	2	0.0004	0	0	2	0.0148	3.7
PR_ETHICS\EDI\BIRTH	1	0.0002	0	0	1	0.0074	2.1
PR_ETHICS\EDI\BIAS*	1	0.0002	0	0	1	0.0074	2.1
PR_ETHICS\CONFIDENT\TAJN*	2	0.0004	0	0	2	0.0148	3.7
PR_ETHICS\CONFIDENT\SEGRET*	10	0.002	0.0001	0.0001	4	0.0296	15.3
PR_ETHICS\CONFIDENT\POVJERLJIV*	4	0.0008	0.0001	0	4	0.0296	6.1
PR_ETHICS\COI\SUKOB*_INTERES*	12	0.0024	0.0002	0.0001	5	0.037	17.2
PR_ETHICS\COI\CONFLITT*_D'INTERESS*	6	0.0012	0.0001	0	4	0.0296	9.2
PR_ETHICS\COI\CONF*_*_INTER*	108	0.0219	0.0016	0.0008	36	0.2667	62
PR_ETHICS\COI\COMPETING_INT*	6	0.0012	0.0001	0	5	0.037	8.6

## Sheet: Country 1st
	Croatia	Italy	Spain	Chi2	P (2-tails)
PR_PROCESS	44	42	43	2.653	0.265
PR_EVALUATION	45	41	44	2.673	0.263
PR_ETHICS	22	21	30	5.314	0.07

## Sheet: Country 2nd
	Croatia	Italy	Spain	Chi2	P (2-tails)
PR_PROCESS\REVIEWER	28	33	37	8.202	0.017
PR_PROCESS\ID_TRANSP	28	35	41	16.437	0
PR_PROCESS\GOVERNANCE	39	29	40	7.558	0.023
PR_EVALUATION\PUBL_TYPE	42	27	34	7.692	0.021
PR_EVALUATION\PR_OUTCOME	40	32	38	2.226	0.329
PR_EVALUATION\EVAL_CRITER	41	38	43	4.287	0.117
PR_ETHICS\TEXT_SIMILAR*	9	9	17	5.547	0.062
PR_ETHICS\RES_MISCONDUCT	2	8	15	13.624	0.001
PR_ETHICS\ETH_GUID	9	12	7	2.084	0.353
PR_ETHICS\EDI	6	14	10	5.289	0.071
PR_ETHICS\CONFIDENT	5	4	0	4.708	0.095
PR_ETHICS\COI	14	15	14	0.342	0.843

## Sheet: Country3rd
	Croatia	Italy	Spain	Chi2	P (2-tails)
PR_PROCESS\REVIEWER\OBJECTIVITY	8	11	12	1.704	0.426
PR_PROCESS\REVIEWER\NUMBER	12	4	13	5.83	0.054
PR_PROCESS\REVIEWER\INDEPEND	11	19	35	29.884	0
PR_PROCESS\REVIEWER\COMPETENCE	9	19	23	12.077	0.002
PR_PROCESS\ID_TRANSP\VISIBLE	0	1	0	2.156	0.34
PR_PROCESS\ID_TRANSP\ANONYM	28	35	41	16.437	0
PR_PROCESS\GOVERNANCE\STEER_COMM	0	2	1	2.259	0.323
PR_PROCESS\GOVERNANCE\SCI/ADVISOR_BOARD	0	12	11	15.426	0
PR_PROCESS\GOVERNANCE\REV_BOARD	0	0	1	2.084	0.353
PR_PROCESS\GOVERNANCE\GOVERN_BOARD	0	0	1	2.084	0.353
PR_PROCESS\GOVERNANCE\ED_BOARD	38	9	34	40.166	0
PR_PROCESS\GOVERNANCE\EDITOR_IN_CHIEF	14	19	18	2.449	0.294
PR_EVALUATION\PUBL_TYPE\REV_PAPER	9	0	5	8.648	0.013
PR_EVALUATION\PUBL_TYPE\PRE_COMM	26	0	0	58.366	0
PR_EVALUATION\PUBL_TYPE\NOTE	1	13	12	14.253	0.001
PR_EVALUATION\PUBL_TYPE\EXPERIENCE	3	0	2	2.614	0.271
PR_EVALUATION\PUBL_TYPE\ESSAY	4	10	5	4.573	0.102
PR_EVALUATION\PUBL_TYPE\DEBATE	2	2	9	8.796	0.012
PR_EVALUATION\PUBL_TYPE\CRIT_DISCUSS	2	0	0	3.68	0.159
PR_EVALUATION\PUBL_TYPE\CONF_REV	3	0	0	5.561	0.062
PR_EVALUATION\PUBL_TYPE\CONF_PAPER	14	1	3	16.539	0
PR_EVALUATION\PUBL_TYPE\COMMENT	0	1	1	1.12	0.571
PR_EVALUATION\PUBL_TYPE\BOOK_REV	16	5	5	9.489	0.009
PR_EVALUATION\PUBL_TYPE\ARTICLE	41	12	15	36.928	0
PR_EVALUATION\PR_OUTCOME\REJECT	13	11	29	19.462	0
PR_EVALUATION\PR_OUTCOME\ACCEPT	39	32	37	1.344	0.511
PR_EVALUATION\EVAL_CRITER\WRITING&PRESENT	37	24	34	6.413	0.041
PR_EVALUATION\EVAL_CRITER\THEORY	19	2	12	15.268	0
PR_EVALUATION\EVAL_CRITER\RELEVANCE	39	32	42	7.384	0.025
PR_EVALUATION\EVAL_CRITER\REF_LITER	35	25	33	3.448	0.178
PR_EVALUATION\EVAL_CRITER\METHOD&STAT	26	14	18	4.434	0.109
PR_EVALUATION\EVAL_CRITER\DESIGN&CONCEP	9	4	6	1.684	0.431
PR_EVALUATION\EVAL_CRITER\AUTH_REPUT	1	2	4	2.33	0.312
PR_ETHICS\TEXT_SIMILAR*	9	9	17	5.547	0.062
PR_ETHICS\RES_MISCONDUCT	2	8	15	13.624	0.001
PR_ETHICS\ETH_GUID	9	12	7	2.084	0.353
PR_ETHICS\EDI	6	14	10	5.289	0.071
PR_ETHICS\CONFIDENT	5	4	0	4.708	0.095
PR_ETHICS\COI	14	15	14	0.342	0.843

## Sheet: Country 4th
	Croatia	Italy	Spain	Chi2	P (2-tails)
PR_PROCESS\REVIEWER\OBJECTIVITY	8	11	12	1.704	0.426
PR_PROCESS\REVIEWER\NUMBER\TWO	11	3	10	5.036	0.081
PR_PROCESS\REVIEWER\NUMBER\THREE_OR_MORE	3	2	10	8.977	0.011
PR_PROCESS\REVIEWER\NUMBER\ONE	4	2	2	0.775	0.679
PR_PROCESS\REVIEWER\INDEPEND	11	19	35	29.884	0
PR_PROCESS\REVIEWER\COMPETENCE	9	19	23	12.077	0.002
PR_PROCESS\ID_TRANSP\VISIBLE	0	1	0	2.156	0.34
PR_PROCESS\ID_TRANSP\ANONYM\TRIPLE_ANON	0	0	1	2.084	0.353
PR_PROCESS\ID_TRANSP\ANONYM\SINGLE_ANON	5	9	7	1.915	0.384
PR_PROCESS\ID_TRANSP\ANONYM\DOUBLE_ANON	14	10	26	13.954	0.001
PR_PROCESS\ID_TRANSP\ANONYM\ANON_GEN	20	34	39	26.682	0
PR_PROCESS\GOVERNANCE\STEER_COMM	0	2	1	2.259	0.323
PR_PROCESS\GOVERNANCE\SCI/ADVISOR_BOARD	0	12	11	15.426	0
PR_PROCESS\GOVERNANCE\REV_BOARD	0	0	1	2.084	0.353
PR_PROCESS\GOVERNANCE\GOVERN_BOARD	0	0	1	2.084	0.353
PR_PROCESS\GOVERNANCE\ED_BOARD	38	9	34	40.166	0
PR_PROCESS\GOVERNANCE\EDITOR_IN_CHIEF	14	19	18	2.449	0.294
PR_EVALUATION\PUBL_TYPE\REV_PAPER\REV_ART	9	0	5	8.648	0.013
PR_EVALUATION\PUBL_TYPE\PRE_COMM	26	0	0	58.366	0
PR_EVALUATION\PUBL_TYPE\NOTE	1	13	12	14.253	0.001
PR_EVALUATION\PUBL_TYPE\EXPERIENCE	3	0	2	2.614	0.271
PR_EVALUATION\PUBL_TYPE\ESSAY	4	10	5	4.573	0.102
PR_EVALUATION\PUBL_TYPE\DEBATE	2	2	9	8.796	0.012
PR_EVALUATION\PUBL_TYPE\CRIT_DISCUSS	2	0	0	3.68	0.159
PR_EVALUATION\PUBL_TYPE\CONF_REV	3	0	0	5.561	0.062
PR_EVALUATION\PUBL_TYPE\CONF_PAPER	14	1	3	16.539	0
PR_EVALUATION\PUBL_TYPE\COMMENT	0	1	1	1.12	0.571
PR_EVALUATION\PUBL_TYPE\BOOK_REV	16	5	5	9.489	0.009
PR_EVALUATION\PUBL_TYPE\ARTICLE\SCHO_ART	38	11	14	31.949	0
PR_EVALUATION\PUBL_TYPE\ARTICLE\PROF_ART	33	1	1	71.126	0
PR_EVALUATION\PR_OUTCOME\REJECT	13	11	29	19.462	0
PR_EVALUATION\PR_OUTCOME\ACCEPT\REVISION	20	29	27	6.806	0.033
PR_EVALUATION\PR_OUTCOME\ACCEPT	37	19	30	11.182	0.004
PR_EVALUATION\EVAL_CRITER\WRITING&PRESENT\STRUCT&LAYOUT	34	17	31	11.9	0.003
PR_EVALUATION\EVAL_CRITER\WRITING&PRESENT\PUBL_GUID	4	4	6	0.772	0.68
PR_EVALUATION\EVAL_CRITER\WRITING&PRESENT\CLARITY	13	11	10	0.236	0.888
PR_EVALUATION\EVAL_CRITER\WRITING&PRESENT\ACCURACY	9	9	3	3.876	0.144
PR_EVALUATION\EVAL_CRITER\WRITING&PRESENT	9	1	13	11.554	0.003
PR_EVALUATION\EVAL_CRITER\THEORY	19	2	12	15.268	0
PR_EVALUATION\EVAL_CRITER\RELEVANCE\SIGNIFICANCE	14	11	12	0.147	0.929
PR_EVALUATION\EVAL_CRITER\RELEVANCE\ORIGINALITY	38	28	40	8.596	0.014
PR_EVALUATION\EVAL_CRITER\RELEVANCE\CONTRIB_PRACT	0	1	5	7.647	0.022
PR_EVALUATION\EVAL_CRITER\RELEVANCE\APPROPRIAT	7	9	4	2.419	0.298
PR_EVALUATION\EVAL_CRITER\RELEVANCE	11	18	19	5.209	0.074
PR_EVALUATION\EVAL_CRITER\REF_LITER	35	25	33	3.448	0.178
PR_EVALUATION\EVAL_CRITER\METHOD&STAT	26	14	18	4.434	0.109
PR_EVALUATION\EVAL_CRITER\DESIGN&CONCEP\REPLICABILITY	2	2	1	0.39	0.823
PR_EVALUATION\EVAL_CRITER\DESIGN&CONCEP	8	2	6	3.333	0.189
PR_EVALUATION\EVAL_CRITER\AUTH_REPUT	1	2	4	2.33	0.312
PR_ETHICS\TEXT_SIMILAR*	9	9	17	5.547	0.062
PR_ETHICS\RES_MISCONDUCT	2	8	15	13.624	0.001
PR_ETHICS\ETH_GUID	9	12	7	2.084	0.353
PR_ETHICS\EDI	6	14	10	5.289	0.071
PR_ETHICS\CONFIDENT	5	4	0	4.708	0.095
PR_ETHICS\COI	14	15	14	0.342	0.843
