# Supplementary material for: Peer Review in Law Journals
Source: Front Res Metr Anal. 2021 Dec 8;6:787768. doi: 10.3389/frma.2021.787768 (PMC8692876; doi:10.3389/frma.2021.787768)
Supplement: Supplementary file 2 [file Table3.xlsx]

## Sheet: Sheet1
CATEGORY	SUBCATEGORY 2	SUBCATEGORY 3	SUBCATEGORY 4	SUBCATEGORY 5	KEYWORD
PR_ETHICS	COI				COI
PR_ETHICS	COI				COMPETING_INT*
PR_ETHICS	COI				CONF*_*_INTER*
PR_ETHICS	COI				CONFLITT*_D'INTERESS*
PR_ETHICS	COI				INTERESSI_CONFLITTUALI
PR_ETHICS	COI				SUKOB*_INTERES*
PR_ETHICS	CONFIDENT				CONFIDEN?IAL*
PR_ETHICS	CONFIDENT				POVJERLJIV*
PR_ETHICS	CONFIDENT				SEGRET*
PR_ETHICS	CONFIDENT				TAJN*
PR_ETHICS	EDI				AGE
PR_ETHICS	EDI				BELIEF*
PR_ETHICS	EDI				BIAS*
PR_ETHICS	EDI				BIRTH
PR_ETHICS	EDI				CITIZENSHIP
PR_ETHICS	EDI				CITTADINAN*
PR_ETHICS	EDI				CREED
PR_ETHICS	EDI				DIS?CRIMINA*
PR_ETHICS	EDI				DISABILITY
PR_ETHICS	EDI				DIVERSIDAD
PR_ETHICS	EDI				DIVERSIT*
PR_ETHICS	EDI				DRŽAVLJANSTV*
PR_ETHICS	EDI				EQUIDAD
PR_ETHICS	EDI				EQUIT*
PR_ETHICS	EDI				ETHNIC*
PR_ETHICS	EDI				ETNIA
PR_ETHICS	EDI				ETNIC*
PR_ETHICS	EDI				ETNIČ*
PR_ETHICS	EDI				G?NERO
PR_ETHICS	EDI				GENDER
PR_ETHICS	EDI				GENERE
PR_ETHICS	EDI				IDEAS_POLÍTICAS
PR_ETHICS	EDI				IDEOLOG*
PR_ETHICS	EDI				INCLUSI?N*
PR_ETHICS	EDI				JEDNAKOST
PR_ETHICS	EDI				MULTILINGUALISM
PR_ETHICS	EDI				MULTILINGUISMO
PR_ETHICS	EDI				MULTILINGÜISMO
PR_ETHICS	EDI				NACIONALNOST*
PR_ETHICS	EDI				NARODNOST*
PR_ETHICS	EDI				NAT*_MINORIT*
PR_ETHICS	EDI				NATIONALITY
PR_ETHICS	EDI				PARCIALID*
PR_ETHICS	EDI				POLITIC*_OPINION*
PR_ETHICS	EDI				POLITIC*_POSIT*
PR_ETHICS	EDI				POLITICAL_BELIE*
PR_ETHICS	EDI				PREGIUDIZI*
PR_ETHICS	EDI				PRISTRAN*
PR_ETHICS	EDI				RACE
PR_ETHICS	EDI				RACIAL
PR_ETHICS	EDI				RAS?
PR_ETHICS	EDI				RAZA
PR_ETHICS	EDI				RAZLIČITOST
PR_ETHICS	EDI				RAZZA
PR_ETHICS	EDI				RELIG*
PR_ETHICS	EDI				ROD?
PR_ETHICS	EDI				SESS?
PR_ETHICS	EDI				SEX*
PR_ETHICS	EDI				SPOL?
PR_ETHICS	EDI				UKLJUČIVOST
PR_ETHICS	EDI				VIŠEJEZIČNOST
PR_ETHICS	ETH_GUID				COMMITT*_ON_PUBL*_ETH*
PR_ETHICS	ETH_GUID				COPE
PR_ETHICS	ETH_GUID				DECLAR*_OF_HELSINK*
PR_ETHICS	ETH_GUID				ICMJE
PR_ETHICS	ETH_GUID				PROMOTING_INTEGRITY_IN_SCIENTIFIC_JOURNAL*
PR_ETHICS	RES_MISCONDUCT				CATTIVA_CONDOTTA
PR_ETHICS	RES_MISCONDUCT				COLPA
PR_ETHICS	RES_MISCONDUCT				FABRICAT*
PR_ETHICS	RES_MISCONDUCT				FALSIFIC*
PR_ETHICS	RES_MISCONDUCT				FRAUD*
PR_ETHICS	RES_MISCONDUCT				FROD*
PR_ETHICS	RES_MISCONDUCT				IMPARCIAL
PR_ETHICS	RES_MISCONDUCT				LAŽNO*
PR_ETHICS	RES_MISCONDUCT				MAL*A_CONDUCT*
PR_ETHICS	RES_MISCONDUCT				MALA*_PRÁCTIC*
PR_ETHICS	RES_MISCONDUCT				MALPRACTI*
PR_ETHICS	RES_MISCONDUCT				MANIPULA*
PR_ETHICS	RES_MISCONDUCT				MISCOND*
PR_ETHICS	RES_MISCONDUCT				NEČESTITOST*
PR_ETHICS	RES_MISCONDUCT				NEPRIHVATLJIV*
PR_ETHICS	RES_MISCONDUCT				OBMANJUJ*
PR_ETHICS	RES_MISCONDUCT				PRATICA_ILLECI*
PR_ETHICS	RES_MISCONDUCT				SESGADO
PR_ETHICS	RES_MISCONDUCT				TRUFFA
PR_ETHICS	RES_MISCONDUCT				ZAVARAVA*
PR_ETHICS	TEXT_SIMILAR*				AUTOPLAG*
PR_ETHICS	TEXT_SIMILAR*				CONTENT_SIMILAR*
PR_ETHICS	TEXT_SIMILAR*				PLAGIA*
PR_ETHICS	TEXT_SIMILAR*				R?CICLA*
PR_ETHICS	TEXT_SIMILAR*				RECIKLIRA*
PR_ETHICS	TEXT_SIMILAR*				RECYCL*
PR_ETHICS	TEXT_SIMILAR*				SAMOPLAG*
PR_ETHICS	TEXT_SIMILAR*				SELF-PLAGIA*
PR_ETHICS	TEXT_SIMILAR*				SIMILARIT*
PR_ETHICS	TEXT_SIMILAR*				SIMILITUD*
PR_ETHICS	TEXT_SIMILAR*				SOMIGLIAN*
PR_ETHICS	ETHICS_GEN				ETHIC*
PR_ETHICS	ETHICS_GEN				ETIKA
PR_ETHICS	ETHICS_GEN				ETIČN*
PR_ETHICS	ETHICS_GEN				ÉTIC*
PR_ETHICS	ETHICS_GEN				ETIC*
PR_EVALUATION	EVAL_CRITER	DESIGN&CONCEP			@INV_DES [DISENO NEAR INVESTIGACI* NEAR ESTUDIO /Y /P5/P5]
PR_EVALUATION	EVAL_CRITER	DESIGN&CONCEP			@RES_DES [DESIGN* NEAR RESEARCH* NEAR STUDY /Y /P5/P5]
PR_EVALUATION	EVAL_CRITER	DESIGN&CONCEP			CONCEPT*
PR_EVALUATION	EVAL_CRITER	DESIGN&CONCEP			PROGETT*_*_RICERC*
PR_EVALUATION	EVAL_CRITER	DESIGN&CONCEP			RACCOLTA_DATI
PR_EVALUATION	EVAL_CRITER	DESIGN&CONCEP			MUESTRA
PR_EVALUATION	EVAL_CRITER	DESIGN&CONCEP			SAMPL*
PR_EVALUATION	EVAL_CRITER	DESIGN&CONCEP			DATA_COLLECT*
PR_EVALUATION	EVAL_CRITER	DESIGN&CONCEP			ESEMPIO
PR_EVALUATION	EVAL_CRITER	DESIGN&CONCEP			RECOP*_*_DATOS
PR_EVALUATION	EVAL_CRITER	DESIGN&CONCEP	REPLICABILITY		REPLICA*
PR_EVALUATION	EVAL_CRITER	EVAL_CRIT_GEN			CRITERIA
PR_EVALUATION	EVAL_CRITER	EVAL_CRIT_GEN			CRITERION
PR_EVALUATION	EVAL_CRITER	EVAL_CRIT_GEN			CRITERIOS
PR_EVALUATION	EVAL_CRITER	EVAL_CRIT_GEN			KRITERIJ*
PR_EVALUATION	EVAL_CRITER	EVAL_CRIT_GEN			PARAMETRI
PR_EVALUATION	EVAL_CRITER	METHOD&STAT			DATA_ANAL*
PR_EVALUATION	EVAL_CRITER	METHOD&STAT			ESTADÍSTIC*
PR_EVALUATION	EVAL_CRITER	METHOD&STAT			M?TOD*
PR_EVALUATION	EVAL_CRITER	METHOD&STAT			METHOD*
PR_EVALUATION	EVAL_CRITER	METHOD&STAT			STATISTIC*
PR_EVALUATION	EVAL_CRITER	RELEVANCE			IMPORTAN*
PR_EVALUATION	EVAL_CRITER	RELEVANCE			INTEREST*_*_READER*
PR_EVALUATION	EVAL_CRITER	RELEVANCE			PERTINEN*
PR_EVALUATION	EVAL_CRITER	RELEVANCE			R?LEVAN*
PR_EVALUATION	EVAL_CRITER	RELEVANCE			VAŽNOST*
PR_EVALUATION	EVAL_CRITER	RELEVANCE	APPROPRIAT		ADEGUATEZZ*
PR_EVALUATION	EVAL_CRITER	RELEVANCE	APPROPRIAT		ADEQUACY
PR_EVALUATION	EVAL_CRITER	RELEVANCE	APPROPRIAT		APPROPRIAT*
PR_EVALUATION	EVAL_CRITER	RELEVANCE	APPROPRIAT		OGOVARAJUĆ?
PR_EVALUATION	EVAL_CRITER	RELEVANCE	APPROPRIAT		PRIMJERENO*
PR_EVALUATION	EVAL_CRITER	RELEVANCE	CONTRIB_PRACT		@CONTR_PRACT [PR?CTI* NEAR CONTR* NEAR INTER* /Y /P4/D4]
PR_EVALUATION	EVAL_CRITER	RELEVANCE	ORIGINALITY		@NIJE_OBJAV [NIJE NEAR OBJAVLJ* /A /S4]
PR_EVALUATION	EVAL_CRITER	RELEVANCE	ORIGINALITY		@NON_PUBBLIC [NON NEAR PUBBLICAT* NEAR PUBLICAT* /Y /S4/P4]
PR_EVALUATION	EVAL_CRITER	RELEVANCE	ORIGINALITY		@NOT_PUBLISH [NOT NEAR PUBLISHED /Y /S5]
PR_EVALUATION	EVAL_CRITER	RELEVANCE	ORIGINALITY		CREATIV*_*_IDEA*
PR_EVALUATION	EVAL_CRITER	RELEVANCE	ORIGINALITY		ESCLUSIV*_OPER*
PR_EVALUATION	EVAL_CRITER	RELEVANCE	ORIGINALITY		EXCLUSIV*_WORK*
PR_EVALUATION	EVAL_CRITER	RELEVANCE	ORIGINALITY		INNOVATIV*
PR_EVALUATION	EVAL_CRITER	RELEVANCE	ORIGINALITY		INOVATIV*
PR_EVALUATION	EVAL_CRITER	RELEVANCE	ORIGINALITY		IZVORN*
PR_EVALUATION	EVAL_CRITER	RELEVANCE	ORIGINALITY		NEOBJAVLJEN*
PR_EVALUATION	EVAL_CRITER	RELEVANCE	ORIGINALITY		NOV?
PR_EVALUATION	EVAL_CRITER	RELEVANCE	ORIGINALITY		NOVEDA*
PR_EVALUATION	EVAL_CRITER	RELEVANCE	ORIGINALITY		NOVELTY
PR_EVALUATION	EVAL_CRITER	RELEVANCE	ORIGINALITY		NOVIT?
PR_EVALUATION	EVAL_CRITER	RELEVANCE	ORIGINALITY		ORIGINAL*
PR_EVALUATION	EVAL_CRITER	RELEVANCE	ORIGINALITY		UNPUBLISHED
PR_EVALUATION	EVAL_CRITER	RELEVANCE	SIGNIFICANCE		SIGNIFIC*
PR_EVALUATION	EVAL_CRITER	RELEVANCE	SIGNIFICANCE		@SIGNIFICANCE [SIGNIF* NEAR CONTRIB* NEAR RESEARCH NEAR RESULT? /Y /S3/D3/D3]
PR_EVALUATION	EVAL_CRITER	RES_DISCUSS			@RES&DISCUSS [R?SULT* NEAR DIS?US* /A /P12]
PR_EVALUATION	EVAL_CRITER	THEORY			TE?RIC*
PR_EVALUATION	EVAL_CRITER	THEORY			TEORIJ*
PR_EVALUATION	EVAL_CRITER	THEORY			THEOR*
PR_EVALUATION	EVAL_CRITER	WRITING&PRESENT			@WRI_STYLE [WRIT* NEAR STYLE /A /P3]
PR_EVALUATION	EVAL_CRITER	WRITING&PRESENT			ESTILO_*_REDACC*
PR_EVALUATION	EVAL_CRITER	WRITING&PRESENT			PRESENTACIÓN
PR_EVALUATION	EVAL_CRITER	WRITING&PRESENT			PRESENTATION
PR_EVALUATION	EVAL_CRITER	WRITING&PRESENT			PRESENTAZIONE
PR_EVALUATION	EVAL_CRITER	WRITING&PRESENT			STILE_*_SCRITT*
PR_EVALUATION	EVAL_CRITER	WRITING&PRESENT			THOROUGHN*
PR_EVALUATION	EVAL_CRITER	WRITING&PRESENT	PUBL_GUID		@PUB_GUID [GUID* NEAR PUB* NEAR PRACT* NEAR STYL* NEAR LANGUA* /Y /P4/P4/P4/P4]
PR_EVALUATION	EVAL_CRITER	WRITING&PRESENT	PUBL_GUID		BEST_PRACTICE_GUIDELINES_FOR_JOURNAL_EDITORS
PR_EVALUATION	EVAL_CRITER	WRITING&PRESENT	PUBL_GUID		EASE
PR_EVALUATION	EVAL_CRITER	WRITING&PRESENT	PUBL_GUID		EUROPEAN_ASSOCIATION_OF_SCIENCE_EDITORS
PR_EVALUATION	EVAL_CRITER	WRITING&PRESENT	PUBL_GUID		INTERNATIONAL_STANDARDS*_FOR_AUTHOR*
PR_EVALUATION	EVAL_CRITER	WRITING&PRESENT	CLARITY		CHIAREZZA
PR_EVALUATION	EVAL_CRITER	WRITING&PRESENT	CLARITY		CLARIDAD
PR_EVALUATION	EVAL_CRITER	WRITING&PRESENT	CLARITY		CLARITY
PR_EVALUATION	EVAL_CRITER	WRITING&PRESENT	CLARITY		CLEAR
PR_EVALUATION	EVAL_CRITER	WRITING&PRESENT	CLARITY		JASN*
PR_EVALUATION	EVAL_CRITER	WRITING&PRESENT	ACCURACY		@COMPL_BIBL [COMPLET* NEAR BIBLIOGRAPH* NEAR SOURC* NEAR L?TTERAT* /Y /S4/D4/D4]
PR_EVALUATION	EVAL_CRITER	WRITING&PRESENT	ACCURACY		ACCURA*
PR_EVALUATION	EVAL_CRITER	WRITING&PRESENT	ACCURACY		CORETAZZA
PR_EVALUATION	EVAL_CRITER	WRITING&PRESENT	ACCURACY		CORRETEZZA
PR_EVALUATION	EVAL_CRITER	WRITING&PRESENT	ACCURACY		EXACTITU*
PR_EVALUATION	EVAL_CRITER	WRITING&PRESENT	ACCURACY		PRECIS*
PR_EVALUATION	EVAL_CRITER	WRITING&PRESENT	ACCURACY		TOČN*
PR_EVALUATION	EVAL_CRITER	WRITING&PRESENT	STRUCT&LAYOUT	ABSTRACT	ABSTRACT
PR_EVALUATION	EVAL_CRITER	WRITING&PRESENT	STRUCT&LAYOUT	ABSTRACT	ESTRATT*
PR_EVALUATION	EVAL_CRITER	WRITING&PRESENT	STRUCT&LAYOUT	ABSTRACT	RESUMEN*
PR_EVALUATION	EVAL_CRITER	WRITING&PRESENT	STRUCT&LAYOUT	ABSTRACT	RIASSUNT*
PR_EVALUATION	EVAL_CRITER	WRITING&PRESENT	STRUCT&LAYOUT	ABSTRACT	SAŽETAK
PR_EVALUATION	EVAL_CRITER	WRITING&PRESENT	STRUCT&LAYOUT	ABSTRACT	SUMMARY
PR_EVALUATION	EVAL_CRITER	WRITING&PRESENT	STRUCT&LAYOUT	CONCLUS	CONCLUS*
PR_EVALUATION	EVAL_CRITER	WRITING&PRESENT	STRUCT&LAYOUT	CONCLUS	ZAKLJUČ*
PR_EVALUATION	EVAL_CRITER	WRITING&PRESENT	STRUCT&LAYOUT	INTRODUCTION	INTRODUCCI*
PR_EVALUATION	EVAL_CRITER	WRITING&PRESENT	STRUCT&LAYOUT	INTRODUCTION	INTRODUCTION
PR_EVALUATION	EVAL_CRITER	WRITING&PRESENT	STRUCT&LAYOUT	INTRODUCTION	INTRODUZION*
PR_EVALUATION	EVAL_CRITER	WRITING&PRESENT	STRUCT&LAYOUT	INTRODUCTION	UVOD
PR_EVALUATION	EVAL_CRITER	WRITING&PRESENT	STRUCT&LAYOUT	INTRODUCTION	LAYOUT
PR_EVALUATION	EVAL_CRITER	WRITING&PRESENT	STRUCT&LAYOUT	INTRODUCTION	STRUCTURE*
PR_EVALUATION	EVAL_CRITER	WRITING&PRESENT	STRUCT&LAYOUT	TITLE	@TITLE [TITLE NEAR #SUBMISS_GEN /A /P7]
PR_EVALUATION	EVAL_CRITER	REF_LITER			BIBLIOGR?FI*
PR_EVALUATION	EVAL_CRITER	REF_LITER			BIBLIOGRAPH*
PR_EVALUATION	EVAL_CRITER	REF_LITER			L?TTERATURA
PR_EVALUATION	EVAL_CRITER	REF_LITER			LITERATUR*
PR_EVALUATION	EVAL_CRITER	REF_LITER			REFERENC*
PR_EVALUATION	EVAL_CRITER	REF_LITER			RIFERIMENT*
PR_EVALUATION	EVAL_CRITER	AUTH_REPUT			@AUTH_REPUT [AUTHOR* NEAR REPUTAT* NEAR AFFILIAT* /Y /S3/S3]
PR_EVALUATION	PR_OUTCOME	ACCEPT			ACCEPT*
PR_EVALUATION	PR_OUTCOME	ACCEPT			ACCETTA*
PR_EVALUATION	PR_OUTCOME	ACCEPT			FAVORAB*
PR_EVALUATION	PR_OUTCOME	ACCEPT			PRIHVA*
PR_EVALUATION	PR_OUTCOME	ACCEPT	REVISION		ALTERA*
PR_EVALUATION	PR_OUTCOME	ACCEPT	REVISION		ALTERE*
PR_EVALUATION	PR_OUTCOME	ACCEPT	REVISION		IZMJEN*
PR_EVALUATION	PR_OUTCOME	ACCEPT	REVISION		MODIFICA*
PR_EVALUATION	PR_OUTCOME	ACCEPT	REVISION		PROMJEN*
PR_EVALUATION	PR_OUTCOME	ACCEPT	REVISION		REVISION*
PR_EVALUATION	PR_OUTCOME	REJECT			DESFAVORAB*
PR_EVALUATION	PR_OUTCOME	REJECT			NOT_ACCEPT*
PR_EVALUATION	PR_OUTCOME	REJECT			ODBIJ*
PR_EVALUATION	PR_OUTCOME	REJECT			RECHAZO
PR_EVALUATION	PR_OUTCOME	REJECT			REFUS*
PR_EVALUATION	PR_OUTCOME	REJECT			REJECT*
PR_EVALUATION	PR_OUTCOME	REJECT			RIFIUT*
PR_EVALUATION	PUBL_TYPE	ARTICLE	PROF_ART		@PROF_ART [PROFES* NEAR #SUBMISS_TYPES /Y /P3]
PR_EVALUATION	PUBL_TYPE	ARTICLE	PROF_ART		CONTR*_PROF*
PR_EVALUATION	PUBL_TYPE	ARTICLE	PROF_ART		PUB*_PROF*
PR_EVALUATION	PUBL_TYPE	ARTICLE	PROF_ART		STRUČN*_ČLAN*
PR_EVALUATION	PUBL_TYPE	ARTICLE	PROF_ART		STRUČN*_RAD*
PR_EVALUATION	PUBL_TYPE	ARTICLE	SCHO_ART		@ACAD_ART [ACADEMIC NEAR PAPER* /Y /P3]
PR_EVALUATION	PUBL_TYPE	ARTICLE	SCHO_ART		@RES_ART [RESEARCH NEAR #SUBMISS_TYPES /Y /P3]
PR_EVALUATION	PUBL_TYPE	ARTICLE	SCHO_ART		@SCHOL_ART [SCHOLARLY NEAR #SUBMISS_TYPES /Y /P3]
PR_EVALUATION	PUBL_TYPE	ARTICLE	SCHO_ART		@SCI_ART [SCIENTIF* NEAR #SUBMISS_TYPES /Y /P3]
PR_EVALUATION	PUBL_TYPE	ARTICLE	SCHO_ART		ART?C*_CIENT*
PR_EVALUATION	PUBL_TYPE	ARTICLE	SCHO_ART		ARTIC*_ACCAD?M*
PR_EVALUATION	PUBL_TYPE	ARTICLE	SCHO_ART		ARTIC*_CIEN*
PR_EVALUATION	PUBL_TYPE	ARTICLE	SCHO_ART		ARTÍC*_DE_INVESTIG*
PR_EVALUATION	PUBL_TYPE	ARTICLE	SCHO_ART		CONTRIBUT*_SCIENTIF*
PR_EVALUATION	PUBL_TYPE	ARTICLE	SCHO_ART		ISTRAŽ*_RAD*
PR_EVALUATION	PUBL_TYPE	ARTICLE	SCHO_ART		RICERCA_ARTIC*
PR_EVALUATION	PUBL_TYPE	ARTICLE	SCHO_ART		ZNANSTVEN*_ČLAN*
PR_EVALUATION	PUBL_TYPE	ARTICLE	SCHO_ART		ZNANSTVEN*_RAD*
PR_EVALUATION	PUBL_TYPE	BOOK_REV			BOOK_REVIEW*
PR_EVALUATION	PUBL_TYPE	BOOK_REV			PRIKAZ*_KNJIG*
PR_EVALUATION	PUBL_TYPE	BOOK_REV			RECEN*_LIBR*
PR_EVALUATION	PUBL_TYPE	BOOK_REV			RECENZ*_KNJIG*
PR_EVALUATION	PUBL_TYPE	BOOK_REV			RESEN*_*_LIBR*
PR_EVALUATION	PUBL_TYPE	BOOK_REV			REVIEW_*_BOOK*
PR_EVALUATION	PUBL_TYPE	BOOK_REV			REVISIÓN_DE_LIBR*
PR_EVALUATION	PUBL_TYPE	COMMENT			@COMMENT [COMMENT* NEAR NOTE? /A /S3]
PR_EVALUATION	PUBL_TYPE	CONF_PAPER			CONFERENCE*
PR_EVALUATION	PUBL_TYPE	CONF_PAPER			CONGRESS?
PR_EVALUATION	PUBL_TYPE	CONF_PAPER			CONVEGN?
PR_EVALUATION	PUBL_TYPE	CONF_PAPER			KONF*
PR_EVALUATION	PUBL_TYPE	CONF_PAPER			PRILO*_*_SKUP*
PR_EVALUATION	PUBL_TYPE	CONF_PAPER			RAD*_*_SKUP*
PR_EVALUATION	PUBL_TYPE	CONF_REV			CONFER*_REVIEW*
PR_EVALUATION	PUBL_TYPE	CONF_REV			PRIKAZ*_KONF*
PR_EVALUATION	PUBL_TYPE	CONF_REV			PRIKAZ*_SKUP*
PR_EVALUATION	PUBL_TYPE	CONF_REV			PRIKAZ_KONF*
PR_EVALUATION	PUBL_TYPE	CONF_REV			PRIKAZ_SKUP*
PR_EVALUATION	PUBL_TYPE	CONF_REV			RECEN*_*_CONFERENZ*
PR_EVALUATION	PUBL_TYPE	CONF_REV			REVIS*_*_*_CONFERENC*
PR_EVALUATION	PUBL_TYPE	CRIT_DISCUSS			CRIT*_DISCUS*
PR_EVALUATION	PUBL_TYPE	CRIT_DISCUSS			DISCUS*_CR?TICA*
PR_EVALUATION	PUBL_TYPE	CRIT_DISCUSS			KRIT*_DISKUS*
PR_EVALUATION	PUBL_TYPE	DEBATE			DEBAT*
PR_EVALUATION	PUBL_TYPE	DEBATE			DISCUSSIONE
PR_EVALUATION	PUBL_TYPE	ESSAY			ENSAYO*
PR_EVALUATION	PUBL_TYPE	ESSAY			ESEJ*
PR_EVALUATION	PUBL_TYPE	ESSAY			ESSAY*
PR_EVALUATION	PUBL_TYPE	ESSAY			SAGG*
PR_EVALUATION	PUBL_TYPE	EXPERIENCE			ESPERIENZE
PR_EVALUATION	PUBL_TYPE	EXPERIENCE			EXPERIENCES
PR_EVALUATION	PUBL_TYPE	EXPERIENCE			EXPERIENCIAS
PR_EVALUATION	PUBL_TYPE	PRE_COMM			BRIEF*_COMMUN*
PR_EVALUATION	PUBL_TYPE	PRE_COMM			COMUNIC*_PRELIM*
PR_EVALUATION	PUBL_TYPE	PRE_COMM			INFORM*_PRELIM*
PR_EVALUATION	PUBL_TYPE	PRE_COMM			KRATKO_PRIOP*
PR_EVALUATION	PUBL_TYPE	PRE_COMM			PRELIMINA*_COMMUN*
PR_EVALUATION	PUBL_TYPE	PRE_COMM			PRELIMINA*_REPORT*
PR_EVALUATION	PUBL_TYPE	PRE_COMM			PRETH*_PRIOP*
PR_EVALUATION	PUBL_TYPE	PRE_COMM			RAPPORT*_PRELIM*
PR_EVALUATION	PUBL_TYPE	REV_PAPER	REV_ART		ART?C*_*_REV*
PR_EVALUATION	PUBL_TYPE	REV_PAPER	REV_ART		REV*_ART*
PR_EVALUATION	PUBL_TYPE	REV_PAPER	REV_ART		REV*_PAPER*
PR_EVALUATION	PUBL_TYPE	REV_PAPER	REV_JURIS		JUDICAL_REVIEW*
PR_EVALUATION	PUBL_TYPE	REV_PAPER	REV_JURIS		RASSEGN*_DI_GIURIS*
PR_EVALUATION	PUBL_TYPE	REV_PAPER	REV_JURIS		RESENA_DE_JURIS*
PR_EVALUATION	PUBL_TYPE	REV_PAPER	REV_JURIS		REVIEW_*_JURIS*
PR_EVALUATION	PUBL_TYPE	REV_PAPER	REV_JURIS		REVIEW_JURIS*
PR_EVALUATION	PUBL_TYPE	REV_PAPER	REV_JURIS		REVISIÓN_DE_JURIS*
PR_EVALUATION	PUBL_TYPE	REV_PAPER	REV_LEGISL		RASSEGN*_DI_LEGISL*
PR_EVALUATION	PUBL_TYPE	REV_PAPER	REV_LEGISL		RESENA_DE_LEGISL*
PR_EVALUATION	PUBL_TYPE	REV_PAPER	REV_LEGISL		REVIEW_OF_LEGISL*
PR_EVALUATION	PUBL_TYPE	REV_PAPER	REV_LEGISL		REVISÓN_DE_LEGISL*
PR_EVALUATION	PUBL_TYPE	SUBMISS_GEN			ARTIC*
PR_EVALUATION	PUBL_TYPE	SUBMISS_GEN			CONTRIBUTION*
PR_EVALUATION	PUBL_TYPE	SUBMISS_GEN			IZVJEŠTAJ*
PR_EVALUATION	PUBL_TYPE	SUBMISS_GEN			IZVJEŠĆ*
PR_EVALUATION	PUBL_TYPE	SUBMISS_GEN			LAVORO
PR_EVALUATION	PUBL_TYPE	SUBMISS_GEN			OPERA
PR_EVALUATION	PUBL_TYPE	SUBMISS_GEN			PAPER*
PR_EVALUATION	PUBL_TYPE	SUBMISS_GEN			PRILOG
PR_EVALUATION	PUBL_TYPE	SUBMISS_GEN			PRILOZI
PR_EVALUATION	PUBL_TYPE	SUBMISS_GEN			PUBLICAT*
PR_EVALUATION	PUBL_TYPE	SUBMISS_GEN			RAD
PR_EVALUATION	PUBL_TYPE	SUBMISS_GEN			RADOVI*
PR_EVALUATION	PUBL_TYPE	SUBMISS_GEN			REPORT*
PR_EVALUATION	PUBL_TYPE	SUBMISS_GEN			RUKOPIS*
PR_EVALUATION	PUBL_TYPE	SUBMISS_GEN			SUBMISSION*
PR_EVALUATION	PUBL_TYPE	SUBMISS_GEN			TRABAJO?
PR_EVALUATION	PUBL_TYPE	SUBMISS_GEN			WORK*
PR_EVALUATION	PUBL_TYPE	SUBMISS_GEN			ČLANAK
PR_EVALUATION	PUBL_TYPE	SUBMISS_GEN			ČLANCI
PR_EVALUATION	PUBL_TYPE	NOTE			CASE_NOTE?
PR_EVALUATION	PUBL_TYPE	NOTE			CHRONICLE*
PR_EVALUATION	PUBL_TYPE	NOTE			CRONACHE*
PR_EVALUATION	PUBL_TYPE	NOTE			CRÓNICA*
PR_EVALUATION	PUBL_TYPE	NOTE			DOCTRIN*
PR_EVALUATION	PUBL_TYPE	NOTE			DOTTRIN*
PR_EVALUATION	PUBL_TYPE	NOTE			DOTTRINA
PR_EVALUATION	PUBL_TYPE	NOTE			NOT*_*_SENTENZ*
PR_EVALUATION	PUBL_TYPE	NOTE			NOT*_GIURISPR*
PR_EVALUATION	PUBL_TYPE	NOTE			NOTA*_*_ORAC*
PR_EVALUATION	PUBL_TYPE	NOTE			NOTAS*_*_LEGISL*
PR_EVALUATION	PUBL_TYPE	NOTE			NOTE_A_SENTENZ*
PR_EVALUATION	PUBL_TYPE	NOTE			TECHNIC*_NOTE?
PR_PROCESS	GOVERNANCE	ED_BOARD			COMIT*_*_REDAZ*
PR_PROCESS	GOVERNANCE	ED_BOARD			COMIT*_EDITO*
PR_PROCESS	GOVERNANCE	ED_BOARD			COMITAT*_REDAZION*
PR_PROCESS	GOVERNANCE	ED_BOARD			CONSE*_*_REDACC*
PR_PROCESS	GOVERNANCE	ED_BOARD			CONSE*_EDITOR*
PR_PROCESS	GOVERNANCE	ED_BOARD			EDITOR*_BOARD*
PR_PROCESS	GOVERNANCE	ED_BOARD			REDACT*_BOARD*
PR_PROCESS	GOVERNANCE	ED_BOARD			UREDNIČK*_ODB*
PR_PROCESS	GOVERNANCE	ED_BOARD			UREDNIŠT*
PR_PROCESS	GOVERNANCE	GOVERN_BOARD			GOVERN*_BOARD*
PR_PROCESS	GOVERNANCE	GOVERN_BOARD			UPRAV*_ODBOR*
PR_PROCESS	GOVERNANCE	REV_BOARD			COMIT*_*_*_VALUTA*
PR_PROCESS	GOVERNANCE	REV_BOARD			COMIT*_*_R?FER*
PR_PROCESS	GOVERNANCE	REV_BOARD			COMIT*_*_REVIS*
PR_PROCESS	GOVERNANCE	REV_BOARD			COMIT*_*_VALUTA*
PR_PROCESS	GOVERNANCE	REV_BOARD			RECENZ*_ODBOR*
PR_PROCESS	GOVERNANCE	REV_BOARD			REVIEW*_BOARD*
PR_PROCESS	GOVERNANCE	SCI/ADVISOR_BOARD			ADVISOR*_BOARD*
PR_PROCESS	GOVERNANCE	SCI/ADVISOR_BOARD			COMIT*_SCIENT*
PR_PROCESS	GOVERNANCE	SCI/ADVISOR_BOARD			CONSE*_ASESOR*
PR_PROCESS	GOVERNANCE	SCI/ADVISOR_BOARD			SAVJET*_ODBOR*
PR_PROCESS	GOVERNANCE	SCI/ADVISOR_BOARD			SCIENTIF*_BOARD*
PR_PROCESS	GOVERNANCE	SCI/ADVISOR_BOARD			ZNAN*_SAVJET*
PR_PROCESS	GOVERNANCE	SCI/ADVISOR_BOARD			ZNANSTV*_ODBOR*
PR_PROCESS	GOVERNANCE	STEER_COMM			COMIT*_DIRE*
PR_PROCESS	GOVERNANCE	STEER_COMM			NADZORN*_ODBOR*
PR_PROCESS	GOVERNANCE	STEER_COMM			STEERING_COMMIT*
PR_PROCESS	GOVERNANCE	EDITOR_IN_CHIEF			DIRECTOR*
PR_PROCESS	GOVERNANCE	EDITOR_IN_CHIEF			EDITOR_IN_CHIEF
PR_PROCESS	GOVERNANCE	EDITOR_IN_CHIEF			EDITOR-IN-CHIEF
PR_PROCESS	GOVERNANCE	EDITOR_IN_CHIEF			CHIEF_EDITOR
PR_PROCESS	GOVERNANCE	EDITOR_IN_CHIEF			CHIEF-EDITOR
PR_PROCESS	GOVERNANCE	EDITOR_IN_CHIEF			GLAVNI_UREDNIK
PR_PROCESS	GOVERNANCE	EDITOR_IN_CHIEF			DIRETTORE
PR_PROCESS	ID_TRANSP	ANONYM	ANON_GEN		AN?N*
PR_PROCESS	ID_TRANSP	ANONYM	ANON_GEN		BLIND*
PR_PROCESS	ID_TRANSP	ANONYM	ANON_GEN		CIEC*
PR_PROCESS	ID_TRANSP	ANONYM	ANON_GEN		CIEG*
PR_PROCESS	ID_TRANSP	ANONYM	ANON_GEN		CONCEAL*
PR_PROCESS	ID_TRANSP	ANONYM	ANON_GEN		NASCONDER*
PR_PROCESS	ID_TRANSP	ANONYM	DOUBLE_ANON		DOBLE
PR_PROCESS	ID_TRANSP	ANONYM	DOUBLE_ANON		DOPPIO
PR_PROCESS	ID_TRANSP	ANONYM	DOUBLE_ANON		DOUBLE
PR_PROCESS	ID_TRANSP	ANONYM	DOUBLE_ANON		DVOSTRUK*
PR_PROCESS	ID_TRANSP	ANONYM	SINGLE_ANON		JEDNOSTRUK*
PR_PROCESS	ID_TRANSP	ANONYM	SINGLE_ANON		SIMPLE
PR_PROCESS	ID_TRANSP	ANONYM	SINGLE_ANON		SINGLE
PR_PROCESS	ID_TRANSP	ANONYM	SINGLE_ANON		SINGOL*
PR_PROCESS	ID_TRANSP	ANONYM	TRIPLE_ANON		TRIPLE
PR_PROCESS	ID_TRANSP	ANONYM	TRIPLE_ANON		TROSTRUK*
PR_PROCESS	ID_TRANSP	VISIBLE			DISCLOS*_IDENTIT*
PR_PROCESS	ID_TRANSP	VISIBLE			NEANONIMN*
PR_PROCESS	ID_TRANSP	VISIBLE			NO*_ANONIM*
PR_PROCESS	ID_TRANSP	VISIBLE			NO_CIEGO
PR_PROCESS	ID_TRANSP	VISIBLE			NON_CIECO
PR_PROCESS	ID_TRANSP	VISIBLE			OPEN_IDENTIT*
PR_PROCESS	ID_TRANSP	VISIBLE			OPEN_PEER_REV*
PR_PROCESS	ID_TRANSP	VISIBLE			OTVOREN*_REC*
PR_PROCESS	ID_TRANSP	VISIBLE			REVEIL*_IDENTIT*
PR_PROCESS	ID_TRANSP	VISIBLE			REVISIÓN_POR_PARES_ABIERTA
PR_PROCESS	ID_TRANSP	VISIBLE			REVISON*_TRA_PARI_APERTA
PR_PROCESS	ID_TRANSP	VISIBLE			UNANON*
PR_PROCESS	PR_GEN				?VALUA*
PR_PROCESS	PR_GEN				ASSESSM*
PR_PROCESS	PR_GEN				PEER?REVIEW*
PR_PROCESS	PR_GEN				PEER_REVIEW*
PR_PROCESS	PR_GEN				PROSUD*
PR_PROCESS	PR_GEN				REVIEW_PROCE*
PR_PROCESS	PR_GEN				VALUTA*
PR_PROCESS	REVIEWER	AUTONOMY			AUT?NOM*_*_EV*
PR_PROCESS	REVIEWER	AUTONOMY			AUT?NOM*_*_RE*
PR_PROCESS	REVIEWER	AUTONOMY			AUT?NOM*_RE*
PR_PROCESS	REVIEWER	AUTONOMY			RE*_AUTONOM*
PR_PROCESS	REVIEWER	COMPETENCE			COMPETEN*
PR_PROCESS	REVIEWER	COMPETENCE			E?PERTI?E
PR_PROCESS	REVIEWER	COMPETENCE			EKSPERT*
PR_PROCESS	REVIEWER	COMPETENCE			EXPERT*
PR_PROCESS	REVIEWER	COMPETENCE			FAMA
PR_PROCESS	REVIEWER	COMPETENCE			KOMPETEN*
PR_PROCESS	REVIEWER	COMPETENCE			STRUČNJ*
PR_PROCESS	REVIEWER	INDEPEND			COMITAT*_INTERNAZ*
PR_PROCESS	REVIEWER	INDEPEND			E?TERN*
PR_PROCESS	REVIEWER	INDEPEND			ESTERN*
PR_PROCESS	REVIEWER	INDEPEND			IND?PEND*
PR_PROCESS	REVIEWER	INDEPEND			INDIPENDEN*
PR_PROCESS	REVIEWER	INDEPEND			NEZAVIS*
PR_PROCESS	REVIEWER	INDEPEND			VANJSK*
PR_PROCESS	REVIEWER	NUMBER	ONE		1ST_REV*
PR_PROCESS	REVIEWER	NUMBER	ONE		FIRST_REV*
PR_PROCESS	REVIEWER	NUMBER	ONE		JED*_REC*
PR_PROCESS	REVIEWER	NUMBER	ONE		ONE_*_RE*
PR_PROCESS	REVIEWER	NUMBER	ONE		ONE_REV*
PR_PROCESS	REVIEWER	NUMBER	ONE		PRIMO
PR_PROCESS	REVIEWER	NUMBER	ONE		PRV?_RE*
PR_PROCESS	REVIEWER	NUMBER	ONE		UNO
PR_PROCESS	REVIEWER	NUMBER	THREE_OR_MORE		3RD_RE*
PR_PROCESS	REVIEWER	NUMBER	THREE_OR_MORE		TERC*
PR_PROCESS	REVIEWER	NUMBER	THREE_OR_MORE		THIRD_RE*
PR_PROCESS	REVIEWER	NUMBER	THREE_OR_MORE		THREE_*_RE*
PR_PROCESS	REVIEWER	NUMBER	THREE_OR_MORE		THREE_RE*
PR_PROCESS	REVIEWER	NUMBER	THREE_OR_MORE		TRE
PR_PROCESS	REVIEWER	NUMBER	THREE_OR_MORE		TREĆ*_RE*
PR_PROCESS	REVIEWER	NUMBER	THREE_OR_MORE		TRES_EV*
PR_PROCESS	REVIEWER	NUMBER	THREE_OR_MORE		TRI_RE*
PR_PROCESS	REVIEWER	NUMBER	TWO		2ND_REV*
PR_PROCESS	REVIEWER	NUMBER	TWO		DOS_EV*
PR_PROCESS	REVIEWER	NUMBER	TWO		DRUG?_RE*
PR_PROCESS	REVIEWER	NUMBER	TWO		DUE
PR_PROCESS	REVIEWER	NUMBER	TWO		DVA*_RE*
PR_PROCESS	REVIEWER	NUMBER	TWO		SECOND
PR_PROCESS	REVIEWER	NUMBER	TWO		TWO_*_RE*
PR_PROCESS	REVIEWER	NUMBER	TWO		TWO_RE*
PR_PROCESS	REVIEWER	OBJECTIVITY			OBIETTIV*
PR_PROCESS	REVIEWER	OBJECTIVITY			OBJECTIV*
PR_PROCESS	REVIEWER	OBJECTIVITY			OBJEKTIV*
PR_PROCESS	REVIEWER	OBJECTIVITY			OBJETIV*
PR_PROCESS	REVIEWER	REVIEWER_GEN			ÁRBITRO
PR_PROCESS	REVIEWER	REVIEWER_GEN			AVALUADOR*
PR_PROCESS	REVIEWER	REVIEWER_GEN			EVALUADOR*
PR_PROCESS	REVIEWER	REVIEWER_GEN			RECENZENT*
PR_PROCESS	REVIEWER	REVIEWER_GEN			REFERAGG*
PR_PROCESS	REVIEWER	REVIEWER_GEN			REFEREE*
PR_PROCESS	REVIEWER	REVIEWER_GEN			REVIEWER*
PR_PROCESS	REVIEWER	REVIEWER_GEN			REVISOR*
PR_PROCESS	REVIEWER	REVIEWER_GEN			VALUTATOR*
