# Supplementary material for: Peer Review in Law Journals
Source: Front Res Metr Anal. 2021 Dec 8;6:787768. doi: 10.3389/frma.2021.787768 (PMC8692876; doi:10.3389/frma.2021.787768)
Supplement: Supplementary file 4 [file Table1.xlsx]

## Sheet: Law journals sample
JOURNAL TITLE	COUNTRY	PISSN	EISSN	DOI	JOURNAL URL (retrieved in June 2021)	PUBLISHER
Croatian International Relations Review	Croatia	1331-1182	1848-5782	https://doi.org/10.37173/cirr	http://cirr.irmo.hr/	Institute for Development and International Relations
Croatian Yearbook of European law & Policy	Croatia	1845-5662	1848-9958		http://www.cyelp.com	University of Zagreb Faculty of Law
Društvena istraživanja	Croatia	1330-0288	1848-6096	https://doi.org/10.5559/di	http://drustvena-istrazivanja.pilar.hr	Institute of Social Sciences Ivo Pilar
Ekonomski vjesnik	Croatia	0353-359X	1847-2206		http://www.efos.unios.hr/ekonomski-vjesnik/	Josip Juraj Strossmayer University of Osijek Faculty of Economics
FIP - Financije i pravo	Croatia	1849-241X	1849-4803		https://hrcak.srce.hr/financije-i-pravo	Effectus - University College for Law
Forum za sigurnosne studije	Croatia	2459-6639			http://www.fpzg.unizg.hr/izdavastvo/casopisi/foss	University of Zagreb Faculty of Political Sciences
Godišnjak Akademije pravnih znanosti Hrvatske	Croatia	1847-7615	1849-0778	10.32984/		Croatian Academy of Legal Sciences
Hrvatska i komparativna javna uprava : časopis za teoriju i praksu javne uprave	Croatia	1848-0357	1849-2150	10.31297/hkju	http://www.ccpa-journal.eu/index.php/ccpa	Institute for Public Administration
Hrvatska pravna revija	Croatia	1332-8670			http://www.ingbiro.hr/hrvatska-pravna-revija.html	Inženjerski biro d.o.o.
Hrvatski časopis za osiguranje	Croatia	2671-2113	2671-2180		http://www.huo.hr/hrvatski-casopis-za-osiguranje/	Croatian Insurance Bureau
Hrvatski ljetopis za kaznene znanosti i praksu	Croatia	2459-6531	2670-9996		https://www.pravo.unizg.hr/hljkpp	Croatian Association for Criminal Science and Practice
InterEULawEast: journal for the international and European law, economics and market integrations	Croatia	1849-3734	1849-4439	10.22598/iele	http://www.efzg.unizg.hr/iele	University of Zagreb Faculty of Economics and Business
Javni bilježnik	Croatia	1331-5978				Croatian Notary Chamber
Kriminologija & socijalna integracija	Croatia	1330-2604	1848-7963	10.31299/ksi	10.31299/ksi	University of Zagreb Faculty of Education and Rehabilitation Sciences
Ljetopis socijalnog rada	Croatia	1846-5412	1848-7971		http://ljsr.pravo.unizg.hr	Faculty of Law, University of Zagreb
Migracijske i etničke teme	Croatia	1333-2546	1848-9184	10.11567/met	http://www.imin.hr/o-metu	Institute for Migration and Ethnic Studies
Paragraf: časopis za pravna i društvena pitanja Pravnog fakulteta Sveučilišta Josipa Jurja Strossmayera u Osijeku	Croatia	2584-3613	2584-3621		http://www.pravos.unios.hr/paragraf	Josip Juraj Strossmayer University of Osijek Faculty of Law
Pilar	Croatia	1846-3010			http://www.pilar.hr	Institute of Social Sciences Ivo Pilar
Policija i sigurnost	Croatia	1330-0229	1848-428X		http://www.policija.hr/12974.aspx	Ministry of Internal Affairs of the Republic of Croatia, Police Academy
Političke perspektive	Croatia	2217-561X	2335-027X	10.20901/pp	https://www.fpzg.unizg.hr/izdavastvo/casopisi/politicke_perspektive	University of Zagreb Faculty of Political Sciences
Pomorski zbornik	Croatia	0554-6397	1848-9052	1.018.048	https://www.pfri.uniri.hr/web/hr/pomorski_zbornik.php	Maritime Studies and Development Association
Pomorstvo	Croatia	1332-0718	1846-8438	10.31217/p	https://www.pfri.uniri.hr/web/hr/casopis_pomorstvo.php	Faculty of Maritime Studies Rijeka
Poredbeno pomorsko pravo	Croatia	1331-9914	1848-8927	10.21857/mjrl3uwg79	http://jadranski-zavod.hazu.hr/hr/publikacije-zavoda/poredbeno-pomorsko-pravo/	Croatian Academy of Sciences and Arts
Pravni vjesnik	Croatia	0352-5317	1849-0840	10.25234/pv	https://hrcak.srce.hr/ojs/index.php/pravni-vjesnik/index	Josip Juraj Strossmayer University of Osijek Faculty of Law
Pravnik	Croatia	0352-342X			http://www.pravnik.hr	Lawyer Association
Pravo u gospodarstvu	Croatia	1330-5476			http://www.pravniciugospodarstvu.hr/casopis.html	Hrvatski savez udruga pravnika u gospodarstvu
Public Sector Economics	Croatia		2459-8860	10.3326/pse	http://www.pse-journal.hr/	Institute of Public Finance
Revija za socijalnu politiku	Croatia	1330-2965	1845-6014	10.3935/rsp	http://www.rsp.hr	University of Zagreb Faculty of Law
Revija za sociologiju	Croatia	0350-154X	1846-7954	10.5613/rzs	http://hsd.hr/en/publishing/about-journal/	Croatian Sociological Society
Sigurnost	Croatia	0350-6886	1848-6347	10.31306/s	http://www.doaj.org	Department of Security Research and Development
Zagrebačka pravna revija	Croatia		1848-6118		http://revija.pravo.unizg.hr	University of Zagreb Faculty of Law
Zbornik Pravnog fakulteta u Rijeci	Croatia	1330-349X	1846-8314	doi.org/10.30925/zpfsr	http://pravri.uniri.hr/hr/advancedmodules/znanost/zbornik.html	University of Rijeka Faculty of Law
Zbornik Pravnog fakulteta u Zagrebu	Croatia	0350-2058	1849-1154		http://zbornik.pravo.hr	University of Zagreb Faculty of Law
Zbornik radova ekomskog fakulteta u Rijeci	Croatia	1331-8004	1846-7520	10.18045/zbefri		Faculty of Economics and Business, University of Rijeka
Zbornik radova Pravnog fakulteta u Splitu	Croatia	0584-9063	1847-0459	10.31141/zrpfs	http://www.pravst.hr/zbornik.php	University of Rijeka Faculty of Law
Zbornik sveučilišta Libertas	Croatia	2584-5055	2584-6167		www.libertas.hr	Libertas International University
Annali del seminario giuridico	Italy	1972-8441			http://www1.unipa.it/~dipstdir/pub/annali/annali.htm	Giappichelli Editore
Archivio giuridico Filippo Serafini	Italy	0391-5646			https://www.mucchieditore.it/index.php?option=com_virtuemart&view=productdetails&virtuemart_product_id=249&virtuemart_category_id=23	Mucchi Editore
ArchivioPenale.it	Italy	2384-9479	0004-0304		http://www.archiviopenale.it	Pisa University Press
Banca borsa e titoli di credito	Italy	0390-9522			https://www.iusexplorer.it/Rivista/Banca_Borsa_Titoli_di_Credito	Giuffrè
BioLaw Journal - Rivista di BioDiritto	Italy	2284-4503	2284-4503		http://rivista.biodiritto.org	Università degli Studi di Trento
Diritti fondamentali	Italy	2240-9823			https://dirittifondamentali.it/	Associazione per la ricerca e lo sviluppo dei diritti fondamentali nazionali ed europei (ARDEF)
Diritto & questioni pubbliche	Italy	1825-0173			http://www.dirittoequestionipubbliche.org	Università degli Studi di Palermo
Diritto e pratica tributaria	Italy	0012-3447			https://shop.wki.it/periodici/diritto-e-pratica-tributaria-s9234/	Wolters Kluwer Italia s.r.l.
Diritto penale contemporaneo	Italy	2240-7618			https://dpc-rivista-trimestrale.criminaljusticenetwork.eu/it	Associazione Progetto giustizia penale
Ephemerides iuris canonici	Italy	0013-9491				Marcianum Press
Etica & politica	Italy	1825-5167			http://www2.units.it/etica/	Edizioni Università di Trieste
Historia et Ius	Italy	2279-7416			http://www.historiaetius.eu/	Dat Donat Dicat Srl
Il Diritto ecclesiastico	Italy	1128-7772			http://www.libraweb.net/sommari.php?chiave=308	Fabrizio Serra Editore
Il Diritto fallimentare e delle società commerciali	Italy	0391-5239			http://www.dirittofallimentaresocieta.it/	Giappichelli Editore
Il Diritto marittimo	Italy	0012-348X			http://www.dirmar.com	Dirmar
Il Foro italiano	Italy	0015-783X			https://www.foroitaliano.it/	Il Foro Italiano
Istituzioni del Federalismo	Italy	1126-7917			http://www.regione.emilia-romagna.it/affari_ist/federalismo	Maggioli
Jura Gentium	Italy	1826-8269			https://www.juragentium.org/about/index.html	Jura Gentium - Centro di filosofia del diritto internazionale e della politica globale
Jus civile	Italy	2421-2563			http://www.juscivile.it/index.php	Giappichelli Editore
JusOnline	Italy	1827-7942			https://jus.vitaepensiero.it/pagina/jusonline-4625.html	Vita e Pensiero
Materiali per una storia della cultura giuridica	Italy	1120-9607			https://www.rivisteweb.it/issn/1120-9607	Il Mulino
Nomos	Italy	2279-7238			http://www.nomos-leattualitaneldiritto.it/	Università La Sapienza - Dipartimento di Scienze Politiche
OIDU - Ordine Internazionale e Diritti Umani	Italy	2284-3531			http://www.rivistaoidu.net/	Università La Sapienza - Dipartimento di Scienze Politiche
Opinio Juris in Comparatione	Italy	2281-5147			http://www.opiniojurisincomparatione.org/	Pacini Editore
Orizzonti del diritto commerciale	Italy	2282-667X	2282-667X		http://rivistaodc.eu/	Associazione Italiana dei Professori Universitari di Diritto commerciale
Osservatorio sulle fonti	Italy	2038-5633			https://www.osservatoriosullefonti.it/	Osservatoriosullefonti.it
Persona e Mercato	Italy	2239-8570			http://www.personaemercato.it/	Dat Donat Dicat Srl
Quaderni fiorentini per la storia del pensiero giuridico moderno	Italy	0392-1867			http://www.centropgm.unifi.it/quaderni/index.htm	Giuffrè
Rassegna tributaria	Italy	1590-749X			https://shop.wki.it/periodici/rassegna-tributaria-s13661/	Wolters Kluwer Italia s.r.l.
Responsabilità civile e previdenza	Italy	0391-187X			https://www.iusexplorer.it/Rivista/Responsabilita_Civile_e_Previdenza?area=riv_risponsabilita_civile	Giuffrè
Rivista del diritto commerciale e del diritto generale delle obbligazioni	Italy	0035-5887			https://www.rivistadeldirittocommerciale.com/	Piccin Nuova Libraria
Rivista del Diritto della Navigazione	Italy	0035-5895			https://www.rivdirnav.org	Aracne editrice
Rivista di Diritto Agrario	Italy	0391-8696			https://www.editorialescientifica.com/materia/diritto-agrario/rivista-di-diritto-agrario	Editoriale Scientifica
Rivista di Diritto Alimentare	Italy	1973-3593			http://www.rivistadirittoalimentare.it/	AIDA - Associazione Italiana di Diritto Alimentare
Rivista di diritto bancario	Italy	2279-9737			https://rivista.dirittobancario.it/	Diritto Bancario
Rivista di diritto civile	Italy	0035-6093			https://shop.wki.it/periodici/rivista-di-diritto-civile-s9993/	Wolters Kluwer Italia s.r.l.
Rivista di diritto finanziario e scienza delle finanze	Italy	0035-6131			https://www.iusexplorer.it/Rivista/Rivista_di_Diritto_Finanziario_e_Scienza_delle_Finanze?area=riv_finanza	Giuffrè
Rivista di diritto internazionale	Italy	0035-6158			https://www.iusexplorer.it/Rivista/Rivista_di_Diritto_Internazionale?area=riv_internazionale	Giuffrè
Rivista di diritto processuale	Italy	0035-6182			https://shop.wki.it/periodici/rivista-di-diritto-processuale-s9995	Wolters Kluwer Italia s.r.l.
Rivista di storia del diritto italiano	Italy	0390-6744			http://www.storiadiritto.it/home.html	Fondazione Sergio Mochi Onory per la storia del diritto italiano
Rivista giuridica del lavoro e della previdenza sociale	Italy	0392-7229			http://www.ediesseonline.it/riviste/rgl	Ediesse
Rivista giuridica dell'edilizia	Italy	0485-2435			https://www.iusexplorer.it/Rivista/Rivista_Giuridica_dell_Edilizia?area=riv_amministrativo	Giuffrè
Rivista trimestrale di diritto e procedura civile	Italy	0391-1896			https://www.iusexplorer.it/Rivista/Rivista_Trimestrale_di_Diritto_e_Procedura_Civile?area=riv_civile	Giuffrè
Società e diritti	Italy	2531-6710			https://riviste.unimi.it/index.php/SED/index	Università degli Studi di Milano
Stato Chiese e pluralismo confessionale	Italy	1971-8543			https://www.statoechiese.it	Università degli Studi di Milano. Istituto di Diritto Internazionale, Diritto ecclesiastico e canonico
Teoria e critica della regolazione	Italy	1970-5476			https://www.mimesisjournals.com/ojs/index.php/tcrs	Centro Studi TCRS
The Italian law Journal	Italy	2421-2156			http://theitalianlawjournal.it	Edizioni Scientifiche Italiane
Anales de la Cátedra Francisco Suárez	Spain	0008-7750	2530-3716	NO	https://revistaseug.ugr.es/index.php/acfs/index	Department of Legal Philosophy of University of Granada
Anuario de Filosofía del Derecho	Spain	0518‐0872		NO	https://www.boe.es/publicaciones/biblioteca_juridica/anuarios_derecho/index.php#F	Ministerio de Justicia y la Agencia Estatal Boletín Oficial del Estado
Anuario de Psicología Jurídica	Spain	1133-0740	2174-0542	https://doi.org/10.1016/j.apj.2016.05.003	https://journals.copmadrid.org/apj/	El Colegio Oficial de la Psicología de Madrid
Anuario Español de Derecho Internacional Privado	Spain	1578–3138		NO	https://aedipr.com/	IPROLEX
CIRIEC-España. Revista Jurídica de Economía Social y Cooperativa	Spain	1577-4430	1989-7332	NO	http://ciriec-revistajuridica.es/	Centro Internacional de Investigación e Información sobre la Economía Pública, Social y Cooperativa
Cuadernos de Derecho Transnacional	Spain		1989-4570	NO	https://e-revistas.uc3m.es/index.php/CDT	Universidad Carlos III de Madrid
Cuadernos de Relaciones Laborales	Spain	1131-8635	1988-2572	https://dx.doi.org/10.5209/CRLA	https://revistas.ucm.es/index.php/CRLA/issue/view/3527	Universidad Complutense de Madrid
Cuadernos Electrónicos de Filosofía del Derecho	Spain		1138-9877	NO	https://ojs.uv.es/index.php/CEFD/index	Universidad de Valencia
Derechos y Libertades	Spain		1133-0937	NO	https://www.uc3m.es/investigacion/derechos-libertades	Universidad Carlos III de Madrid
Doxa. Cuadernos de Filosofía del Derecho	Spain	0214-8676	2386-4702	DOI: 10.14198/DOXA	https://rua.ua.es/dspace/handle/10045/9949	Universidad de Alicante
Gestión y Análisis de Políticas Públicas	Spain	1134-6035		DOI: 10.24965/gapp	https://revistasonline.inap.es/index.php/GAPP/indicaciones_revision	Instituto Nacional de Administración Pública (INAP)
Hacienda Pública Española	Spain	0210-1173		NO	https://hpe-rpe.org/	Ministerio de Hacienda
Historia Constitucional. Revista Electrónica de Historia Constitucional	Spain		1576-4729	NO	http://www.historiaconstitucional.com/index.php/historiaconstitucional	Centro de Estudios Políticos y Constitucionales
Historia. Instituciones. Documentos	Spain	0210-7716	2253-8291	http://dx.doi.org/10.12795/HID	https://editorial.us.es/es/revistas/historia-instituciones-documentos	Universidad de Sevilla
IDP. Revista de Internet, Derecho y Política	Spain		1699-8154	http://dx.doi.org/10.7238/issn.1699-8154	https://idp.uoc.edu/	Universidad Oberta de Cataluña
Ius Canonicum	Spain	0021-325X	2254-6219	NO	https://www.unav.edu/publicaciones/revistas/index.php/ius-canonicum	Universidad de Navarra
Relaciones Internacionales	Spain		1699-3950	10.15366/relacionesinternacionales	https://revistas.uam.es/relacionesinternacionales	Universidad Autonoma de Madrid
Revista Catalana de Dret Públic	Spain	1885-5709	1885-8252	NO	http://revistes.eapc.gencat.cat/index.php/rcdp	Generalitat de Catalunya: Escola d'Administració Pública de Catalunya
Revista Crítica de Derecho Inmobiliario	Spain	0210-0444		NO	https://www.revistacritica.es/	Colegio de Registradores de la Propiedad y Mercantiles de España
Revista de Administración Pública	Spain	0034-7639	1989-0656	10.18042/cepc/rap	http://www.cepc.gob.es/publicaciones/revistas/revistaselectronicas?IDR=1&IDN=ALL	Centro de Estudios Políticos y Constitucionales
Revista de Derecho Comunitario Europeo	Spain	1138-4026	1989-5569	10.18042/cepc/rdce	http://www.cepc.gob.es/publicaciones/revistas/revistaselectronicas	Centro de Estudios Políticos y Constitucionales
Revista de Derecho Político	Spain	0211-979X	2174-5625	NO	http://revistas.uned.es/index.php/derechopolitico	UNED, Universidad Nacional de Educación a Distancia
Revista de Estudios de la Administración Local y Autonómica	Spain		1989-8975	DOI: 10.24965/reala	https://revistasonline.inap.es/index.php/REALA	Instituto Nacional de Administración Pública (INAP)
Revista de Estudios Políticos	Spain	0048-7694	1989-0613	10.18042/cepc/rep	http://www.cepc.gob.es/publicaciones/revistas/revistaselectronicas?IDR=3	Centro de Estudios Políticos y Constitucionales
Revista de Estudios Regionales	Spain	0213-7585	2695-446X	NO	http://www.revistaestudiosregionales.com/boletin	Universidad de Córdoba, Universidad de Málaga, Universidad de Sevilla, Universidad de Granada, Universidad de Jaén, Universidad de Huelva, Universidad de Almería
Revista de Llengua i Dret	Spain	0212-5056	2013-1453	NO	http://revistes.eapc.gencat.cat/index.php/rld	Generalitat de Catalunya: Escola d'Administració Pública de Catalunya
Revista Española de Ciencia Política (RECP)	Spain	1575-6548	2173-9870	10.21308/recp	https://recyt.fecyt.es/index.php/recp/	Asociación Española de Ciencia Política y de la Administración
Revista Española de Derecho Constitucional	Spain	0211-5743	1989-0648	10.18042/cepc/redc	http://www.cepc.gob.es/publicaciones/revistas/revistaselectronicas?IDR=6	Centro de Estudios Políticos y Constitucionales
REVISTA ESPAÑOLA DE DERECHO INTERNACIONAL	Spain	0034-9380	2387-1253	NO	http://www.revista-redi.es/es/	Asociación Española de Profesores de Derecho Internacional y Relaciones Internacionales
Revista General de Derecho Administrativo	Spain		1696-9650	NO	https://www.iustel.com/v2/revistas/detalle_revista.asp?id=1&z=5	Iustel
REVISTA GENERAL DE DERECHO EUROPEO	Spain		1696-9634	NO	https://www.iustel.com/v2/revistas/detalle_revista.asp?z=5&id=13	Iustel
REVISTA GENERAL DE DERECHO PENAL	Spain		1698-1189	NO	https://www.iustel.com/v2/revistas/detalle_revista.asp?numero=32&id=8	Iustel
REVISTA GENERAL DE DERECHO PROCESAL	Spain	1696-9642		NO	https://www.iustel.com/v2/revistas/detalle_revista.asp?id=9&z=5	Iustel
REVISTA GENERAL DE DERECHO PÚBLICO COMPARADO	Spain	1988-5091		NO	https://www.iustel.com/v2/revistas/detalle_revista.asp?id=14&z=5	Iustel
Sociología del Trabajo	Spain	0210-8364	2603-9710	https://dx.doi.org/10.5209/STRA	https://revistas.ucm.es/index.php/STRA	Universidad Complutense de Madrid
Teoría y Realidad Constitucional	Spain	1139-5583		NO	https://www2.uned.es/dpto-derecho-politico/teorpres.htm	Departamento de Derecho Político de la UNED / Centro de Estudios Ramón Areces

## Sheet: Collected documents
JOURNAL TITLE	COUNTRY	PISSN	EISSN	FILENAME	DOCUMENT URL (retriEved in June 2021)	ORIGINAL DOCUMENT TITLE	DOCUMENT TYPE	DOCUMENT LANGUAGE
Hrvatski časopis za osiguranje	Croatia	2671-2113	2671-2180	2671-2113.pdf	http://www.huo.hr/hrvatski-casopis-za-osiguranje/wp-content/uploads/2019/07/Upute-autorima-srpanj-2019000000000020090.pdf	Upute za pisanje sažetaka i prijavu rada	ItAs	HR
Anales de la Cátedra Francisco Suárez	Spain	0008-7750	2530-3716	0008-7750_1.docx	http://revistaseug.ugr.es/index.php/acfs/about	About the Journal	AboutJ	EN
Anales de la Cátedra Francisco Suárez	Spain	0008-7750	2530-3716	0008-7750_2.docx	http://revistaseug.ugr.es/index.php/acfs/about/submissions	Submissions	ItAs	EN
Diritto e pratica tributaria	Italy	0012-3447		0012-3447.docx	https://legacyshop.wki.it/documenti/00065439_somac.pdf?download=true		Note	IT
Il Diritto marittimo	Italy	0012-348X		0012-348X.docx	http://www.dirmar.com/index.php/it/referaggio	Referaggio	PRPol	IT
Ephemerides iuris canonici	Italy	0013-9491		0013-9491.docx	http://riviste.gruppostudium.it/ephemerides-iuris-canonici	Home page	JWs	IT
Il Foro italiano	Italy	0015-783X		0015-783X.docx	https://www.foroitaliano.it/chisiamo/	Home page	JWs	IT
Ius Canonicum	Spain	0021-325X	2254-6219	0021-325X_1.docx	Specific info | Ius Canonicum (unav.edu)	Peer Review Process	PRPol	SP
Revista de Administración Pública	Spain	0034-7639	1989-0656	0034-7639_1.docx	normas (cepc.gob.es)	Proceso de publicación	EdPol	SP
REVISTA ESPAÑOLA DE DERECHO INTERNACIONAL	Spain	0034-9380	2387-1253	0034-9380_1.docx	Contributions – Revista REDI (revista-redi.es)	Contributions	ItAs	EN
REVISTA ESPAÑOLA DE DERECHO INTERNACIONAL	Spain	0034-9380	2387-1253	0034-9380_2.docx	1 (revista-redi.es)	GENERAL GUIDELINES	EdPol	EN
Rivista del Diritto della Navigazione	Italy	0035-5895		0035-5895	https://www.rivdirnav.org/criteri-di-referaggio/	Criteri di referaggio	PRPol	IT
Rivista di diritto civile	Italy	0035-6093		0035-6093.docx	https://legacyshop.wki.it/documenti/00068769_codet.pdf?download=true	Codice etico	pubEth	IT
Rivista di diritto finanziario e scienza delle finanze	Italy	0035-6131		0035-6131.pdf	https://giurisprudenza.unipv.it/images/RDFSF_regolamento.pdf	Regolamento di autodisciplina dell’attività di revisione	ItRs	IT
Rivista di diritto internazionale	Italy	0035-6158		0035-6158.pdf	https://shop.giuffre.it/pub/media/altriallegati/Codice_Etico_Riv_Dir_Int.pdf	Codice etico	pubEth	IT
Revista de Estudios Políticos	Spain	0048-7694	1989-0613	0048-7694_1.docx	About the Journal | Revista de Estudios Políticos (fecyt.es)	Enfoque y Alcance	AboutJ	SP
Revista Crítica de Derecho Inmobiliario	Spain	0210-0444		0210-0444_1.docx	The document does not have URL	CÓDIGO DE BUENAS PRÁCTICAS	EdPol	SP
Hacienda Pública Española	Spain	0210-1173		0210-1173_1.pdf	AIMS AND SCOPE – Hacienda Pública Española / Review of Public Economics (hpe-rpe.org)	AIMS AND SCOPE	AboutJ	EN
Historia. Instituciones. Documentos	Spain	0210-7716	2253-8291	0210-7716_1.docx	Historia. Instituciones. Documentos (us.es)	About the Journal	AboutJ	EN
Historia. Instituciones. Documentos	Spain	0210-7716	2253-8291	0210-7716_2.docx	Article Submission Guidelines | Historia. Instituciones. Documentos (us.es)	Article Submission Guidelines	ItAs	EN
Sociología del Trabajo	Spain	0210-8364	2603-9710	0210-8364_1.docx	About the Journal | Sociología del Trabajo (ucm.es)	Focus and Scope	AboutJ	EN
Revista Española de Derecho Constitucional	Spain	0211-5743	1989-0648	0211-5743_1.docx	Normas Editoriales (cepc.gob.es)	About the journal	AboutJ	EN
Revista de Derecho Político	Spain	0211-979X	2174-5625	0211-979X_1.docx	Sobre la revista | Revista de Derecho Político (uned.es)	Sobre la revista	AboutJ	SP
Revista de Llengua i Dret	Spain	0212-5056	2013-1453	0212-5056_1.docx	Editorial Policies (gencat.cat)	Editorial Policies	EdPol	EN
Revista de Estudios Regionales	Spain	0213-7585	2695-446X	0213-7585_1.docx	Revista de Estudios Regionales (revistaestudiosregionales.com)	GUIDE FOR AUTHORS	ItAs	EN
Doxa. Cuadernos de Filosofía del Derecho	Spain	0214-8676	2386-4702	0214-8676_1.docx	Editorial Policies (ua.es)	Editorial Policies	EdPol	EN
Revija za sociologiju	Croatia	0350-154X	1846-7954	0350-154X.pdf	https://hrcak.srce.hr/upute/upute_autorima_Revija_za_sociologiju.pdf	Guidelines for authors	ItAs	HR-EN
Zbornik Pravnog fakulteta u Zagrebu	Croatia	0350-2058	1849-1154	0350-2058.docx	https://hrcak.srce.hr/upute/guide_authors_Collected_Papers_of_Zagreb_Law_Faculty.doc	Information for contributors	ItAs	EN
Sigurnost	Croatia	0350-6886	1848-6347	0350-6886_1.pdf	https://hrcak.srce.hr/upute/guide_authors_Sigurnost.pdf	Notes to authors	ItAs	EN
Sigurnost	Croatia	0350-6886	1848-6347	0350-6886.pdf	https://hrcak.srce.hr/upute/guide_reviewers_Sigurnost.pdf	Gudelines for reviewers to follow	ItRs	EN
Pravnik	Croatia	0352-342X		0352-342X_1.pdf	https://hrcak.srce.hr/upute/upute_autorima_Pravnik.pdf	Pravila za objavu radova u časopisu	ItAs	HR
Pravnik	Croatia	0352-342X		0352-342X.pdf	https://hrcak.srce.hr/upute/upute_recenzenti_Pravnik.pdf	Obrazac za recenziju	revForm	HR
Pravni vjesnik	Croatia	0352-5317	1849-0840	0352-5317.pdf	https://hrcak.srce.hr/upute/guide_authors_Poredbeno_pomorsko_pravo.pdf	Instructions for authors	ItAs	EN
Ekonomski vjesnik	Croatia	0353-359X	1847-2206	0353-359X.html	http://www.efos.unios.hr/ekonomski-vjesnik/eticka-nacela/	Publication ethics	PubEth	HR
Ekonomski vjesnik	Croatia	0353-359X	1847-2206	0353-359X.pdf	https://hrcak.srce.hr/upute/guide_reviewers_Econviews.pdf	Review Form	RevForm	EN
Rivista di storia del diritto italiano	Italy	0390-6744		0390-6744.pdf	http://www.storiadiritto.it/Codice.pdf	Codice etico	pubEth	IT
Banca borsa e titoli di credito	Italy	0390-9522		0390-9522.pdf	https://shop.giuffre.it/pub/media/indicefascicoli/R021100637_indice.pdf		Note	IT
Responsabilità civile e previdenza	Italy	0391-187X		0391-187X.pdf	https://shop.giuffre.it/pub/media/altriallegati/ResponsabilitaCivileePrevidenza_codice_etico.pdf	Codice etico	pubEth	IT
Il Diritto fallimentare e delle società commerciali	Italy	0391-5239		0391-5239.docx	http://www.dirittofallimentaresocieta.it/Page/t01/view_html?idp=35	Procedura di revisione	PRPol	IT
Archivio giuridico Filippo Serafini	Italy	0391-5646		0391-5646.pdf	https://www.mucchieditore.it/images/ExtraRiviste/InformazioniSpecificheAG.pdf	Informazioni specifiche sulla Rivista: contenuti, periodicità, policy di accesso aperto (Open Access), procedura di revisione double-blind peer review, dichiarazione di pubblicazione etica e di negligenza editoriale, elenco di Revisori, indicizzazione della Rivista	ItRs	IT
Quaderni fiorentini per la storia del pensiero giuridico moderno	Italy	0392-1867		0392-1867.pdf	http://www.centropgm.unifi.it/quaderni/codice-etico.pdf	Codice etico	pubEth	IT
Rivista giuridica del lavoro e della previdenza sociale	Italy	0392-7229		0392-7229.docx	http://www.labourlawjournals.com/journals/rivista-giuridica-del-lavoro-e-della-previdenza-sociale/#about	About the Journal	AboutJ	EN
Rivista giuridica dell'edilizia	Italy	0485-2435		0485-2435.pdf	https://shop.giuffre.it/pub/media/altriallegati/Edilizia_regolamento_referaggio.pdf	VALUTAZIONE SCIENTIFICA DEI CONTRIBUTI PUBBLICATINELLE PARTI II E III E DELLE NOTE A SENTENZA	PRPol	IT
Anuario de Filosofía del Derecho	Spain	0518‐0872		0518-0872_1.pdf	Microsoft Word - REV AFD Instrucciones autoras y autores.docx (filosofiadelderecho.org)	Instrucciones para autores y autoras	ItAs	SP
Pomorski zbornik	Croatia	0554-6397	1848-9052	0554-6397.docx	https://www.pfri.uniri.hr/web/hr/dokumenti/PZ/Recenzentski_obrazac.doc	Article review	RevForm	EN
Pomorski zbornik	Croatia	0554-6397	1848-9052	0554-6397.pdf	https://hrcak.srce.hr/upute/guide_authors_Pomorski_zbornik.pdf	Instructions for authors	ItAs	EN
Zbornik radova Pravnog fakulteta u Splitu	Croatia	0584-9063	1847-0459	0584-9063.pdf	https://hrcak.srce.hr/upute/guide_authors_Zbornik_radova_Pravnog_fakulteta_u_Splitu.pdf	Instructions for contributors	ItAs	EN
Materiali per una storia della cultura giuridica	Italy	1120-9607		1120-9607.docx	https://docs.google.com/document/d/1eGTjT0mvVUnTyg7lRXjZPUD3fsRsSagJnUJDvzvpa0o/edit	Dichiarazione sull’etica e sulle pratiche scorrette nella pubblicazione dei lavori scientifici	PubEth	IT
Istituzioni del Federalismo	Italy	1126-7917		1126-7917.pdf	https://www.regione.emilia-romagna.it/affari_ist/federalismo/docs/IdF%20-%20Editorial%20guidelines%20and%20Info.pdf	Editorial guidelines	EdPol	EN
Il Diritto ecclesiastico	Italy	1128-7772		1128-7772_1.docx	http://www.libraweb.net/riviste.php?chiave=308	Home page	JWs	EN
Il Diritto ecclesiastico	Italy	1128-7772		1128-7772_2.pdf	http://www.libraweb.net/documenti/PeerReview.pdf	Peer Review Policy	PRPol	EN
Cuadernos de Relaciones Laborales	Spain	1131-8635	1988-2572	1131-8635_1.docx	Submissions | Cuadernos de Relaciones Laborales (ucm.es)	Submission Preparation Checklist	ItAs	EN
Anuario de Psicología Jurídica	Spain	1133-0740	2174-0542	1133-0740_1.docx	https://journals.copmadrid.org/apj/acerca-de	About the Journal	AboutJ	EN
Derechos y Libertades	Spain		1133-0937	1133-0937_1.docx	Editorial Policies (uc3m.es)	Editorial Policies	EdPol	EN
Gestión y Análisis de Políticas Públicas	Spain	1134-6035		1134-6035_1.docx	About the Journal | Gestión y Análisis de Políticas Públicas (inap.es)	About the Journal: Focus	AboutJ	EN
Gestión y Análisis de Políticas Públicas	Spain	1134-6035		1134-6035_2.docx	Reviewers guidelines | Gestión y Análisis de Políticas Públicas (inap.es)	Reviewers guidelines	ItRs	EN
Gestión y Análisis de Políticas Públicas	Spain	1134-6035		1134-6035_3.docx	About the Journal | Gestión y Análisis de Políticas Públicas (inap.es)	About the Journal: Peer review process	PRPol	EN
Revista de Derecho Comunitario Europeo	Spain	1138-4026	1989-5569	1138-4026_1.docx	normas (cepc.gob.es)	Política editorial y modalidades de publicación	EdPol	SP
Cuadernos Electrónicos de Filosofía del Derecho	Spain		1138-9877	1138-9877_1.docx	Editorial Policies (uv.es)	Focus and Scope	AboutJ	EN
Teoría y Realidad Constitucional	Spain	1139-5583		1139-5583_1.pdf	Microsoft Word - Formulario Evaluacion wEB.doc (uned.es)	FORMULARIO DE EVALUACIÓN	revForm	SP
Teoría y Realidad Constitucional	Spain	1139-5583		1139-5583_2.pdf	Teoría y Realidad Constitucional (uned.es)	NORMAS DE PUBLICACIÓN	EdPol	SP
Policija i sigurnost	Croatia	1330-0229	1848-428X	1330-0229.pdf	https://hrcak.srce.hr/upute/guide_authors_Policija_i_sigurnost.pdf	Instructions to authors	ItAs	EN
Policija i sigurnost	Croatia	1330-0229	1848-428X	1330-0229.pdf	https://hrcak.srce.hr/upute/upute_recenzenti_Policija_i_sigurnost.pdf	Upute za recenzente	ItRs	HR
Društvena istraživanja	Croatia	1330-0288	1848-6096	1330-0288.mhtml	http://drustvena-istrazivanja.pilar.hr/index.php/drustvena-istrazivanja/about/editorialPolicies#peerReviewProcess	Editorial policies	EdPol	EN
Kriminologija & socijalna integracija	Croatia	1330-2604	1848-7963	1330-2604_1.pdf	https://hrcak.srce.hr/upute/guide_reviewers_Kriminologija___socijalna_integracija.doc	Report form	RevForm	EN
Kriminologija & socijalna integracija	Croatia	1330-2604	1848-7963	1330-2604.pdf	https://hrcak.srce.hr/upute/guide_authors_Kriminologija___socijalna_integracija.pdf	Guidelines for authors	ItAs	EN
Revija za socijalnu politiku	Croatia	1330-2965	1845-6014	1330-2965.mhtml	http://www.rsp.hr/ojs2/index.php/rsp/about/editorialPolicies#peerReviewProcess	Uređivačka politika	EdPol	HR
Zbornik Pravnog fakulteta u Rijeci	Croatia	1330-349X	1846-8314	1330-349X.pdf	https://hrcak.srce.hr/upute/guide_authors_Zbornik_Pravnog_fakulteta_Sveucilista_u_Rijeci.pdf	Instructions for authors	ItAs	EN
Pravo u gospodarstvu	Croatia	1330-5476		1330-5476	http://www.pravniciugospodarstvu.hr/casopis.html	Home page	JWs	HR
Croatian International Relations Review	Croatia	1331-1182	1848-5782	1331-1182.docx	https://hrcak.srce.hr/upute/guide_authors_Croatian_International_Relations_Review.pdf	Instructions for authors	ItAs	EN
Javni bilježnik	Croatia	1331-5978		1331-5978	https://hrcak.srce.hr/upute/upute_autorima_Javni_biljeznik.docx	Upute autorima	ItAs	HR
Javni bilježnik	Croatia	1331-5978		1331-5978.doc	https://hrcak.srce.hr/upute/upute_recenzenti_Javni_biljeznik.doc	Upute recenzentima	ItRs	HR
Zbornik radova ekomskog fakulteta u Rijeci	Croatia	1331-8004	1846-7520	1331-8004_1.pdf	https://www.efri.uniri.hr/upload/Zbornik%202_2020/upute-hr-engl-2020-2.pdf	Guidelines for authors	ItAs	EN
Zbornik radova ekomskog fakulteta u Rijeci	Croatia	1331-8004	1846-7520	1331-8004.pdf	http://www.efri.uniri.hr/upload/ZBORNIK%202_2019/GUIDELINES%20%20TO%20REVIEWERS.pdf	Guidelines for reviewers - Reviewer evaluation form	ItRs	EN
Poredbeno pomorsko pravo	Croatia	1331-9914	1848-8927	1331-9914.pdf	http://jadranski-zavod.hazu.hr/files/file/pdf/PPP/0_PPP_etika_hr.pdf	Etički kodeks uredništva časopisa	PubEth	HR
Pomorstvo	Croatia	1332-0718	1846-8438	1332-0718.docx	https://www.pfri.uniri.hr/web/hr/dokumenti/pomorstvo/Pomorstvo_Review_form_FMSR_2020.docx	Reviewer assessment form	revForm	EN
Pomorstvo	Croatia	1332-0718	1846-8438	1332-0718.pdf	https://hrcak.srce.hr/upute/guide_reviewers_Pomorstvo.pdf	Instructions to reviewers	ItRs	EN
Hrvatska pravna revija	Croatia	1332-8670		1332-8670.mhtml	https://www.ingbiro.com/komunikacija/uputeautorima.aspx	Upute autorima	ItAs	HR
Migracijske i etničke teme	Croatia	1333-2546	1848-9184	1333-2546.mhtml	https://ojs.imin.hr/index.php/met/about/editorialPolicies#peerReviewProcess	Uređivačka politika	EdPol	HR
Migracijske i etničke teme	Croatia	1333-2546	1848-9184	1333-2546.pdf	https://hrcak.srce.hr/upute/guide_authors_Migracijske_i_etnicke_teme.pdf	Guidelines for contributors	ItAs	EN
Revista Española de Ciencia Política (RECP)	Spain	1575-6548	2173-9870	1575-6548_1.docx	About the Journal | Revista Española de Ciencia Política (fecyt.es)	Focus and Scope	AboutJ	EN
Historia Constitucional. Revista Electrónica de Historia Constitucional	Spain		1576-4729	1576-4729_1.docx	About the Journal | Historia Constitucional (E-Jhttp://www.unioviedo.es/constitucional/HC/logos/2019_Historournal of Constitutional History)	About the Journal	AboutJ	EN
CIRIEC-España. Revista Jurídica de Economía Social y Cooperativa	Spain	1577-4430	1989-7332	1577-4430_1.docx	ciriec-revistajuridica.es/normas-de-publicacion/	Normas de publicación	EdPol	SP
Anuario Español de Derecho Internacional Privado	Spain	1578–3138		1578-3138_1.docx	Normas editoriales | Anuario español de Derecho internacional privado (aedipr.com)	Normas editoriales	EdPol	SP
Anuario Español de Derecho Internacional Privado	Spain	1578–3139		1578-3138_2.docx	Guía de buenas prácticas | Anuario español de Derecho internacional privado (aedipr.com)	Guía de buenas prácticas	EdPol	SP
Rassegna tributaria	Italy	1590-749X		1590-749X.docx	https://legacyshop.wki.it/documenti/30000256_dem.pdf?download=true	REGOLAMENTO DI AUTODISCIPLINA DI RASSEGNA TRIBUTARIA	PRPol	IT
REVISTA GENERAL DE DERECHO EUROPEO	Spain		1696-9634	1696-9634_1.pdf	Microsoft Word - Instrucciones_13.doc (iustel.com)	INSTRUCCIONES A LOS AUTORES. REVISTAS GENERALES	ItAs	SP
REVISTA GENERAL DE DERECHO PROCESAL	Spain	1696-9642		1696-9642_1.pdf	Microsoft Word - Instrucciones_9.doc (iustel.com)	INSTRUCCIONES A LOS AUTORES. REVISTAS GENERALES	ItAs	SP
Revista General de Derecho Administrativo	Spain		1696-9650	1696-9650_1.pdf	Instrucciones_1.pdf (iustel.com)	INSTRUCCIONES A LOS AUTORES. REVISTAS GENERALES	ItAs	SP
REVISTA GENERAL DE DERECHO PENAL	Spain		1698-1189	1698-1189_1.pdf	INSTRUCCIONES A LOS AUTORES (iustel.com)	INSTRUCCIONES A LOS AUTORES. REVISTAS GENERALES	ItAs	SP
Relaciones Internacionales	Spain		1699-3950	1699-3950_1.docx	About the Journal | Relaciones Internacionales (uam.es)	About the Journal	AboutJ	EN
IDP. Revista de Internet, Derecho y Política	Spain		1699-8154	1699-8154_1.docx	About the Journal | IDP. Internet, Law and Politics E-Journal (raco.cat)	About the journal: Focus and Scope	AboutJ	EN
Rivista di Diritto Alimentare	Italy	1973-3593		1793-3593.pdf	http://www.rivistadirittoalimentare.it/nota_autori.pdf	Nota per gli autori	ItAs	IT
Diritto & questioni pubbliche	Italy	1825-0173		1825-0173.pdf	http://www.dirittoequestionipubbliche.org/page/asset/DQ_criteri_redazionali_ENG.pdf	Instructions for authors	ItAs	EN
Etica & politica	Italy	1825-5167		1825-5167.pdf	http://www2.units.it/etica/HOWTOSUBMIT.pdf	HOW TO SUBMIT A MANUSCRIPTTOE&P	ItAs	EN
Jura Gentium	Italy	1826-8269		1826-8269.pdf	https://www.juragentium.org/about/it/ref_en.pdf	Modalità di consultazione, proposte di pubblicazione, codice etico, norme redazionali, regole di citazione	EdPol	EN
JusOnline	Italy	1827-7942		1827-7942.pdf	https://jusvitaepensiero.mediabiblos.it/allegati/pdf/jus_submission_guidelines-194.pdf	Submission and Author guidelines	ItAs	EN
Croatian Yearbook of European law & Policy	Croatia	1845-5662	1848-9958	1845-5662.mhtml	https://hrcak.srce.hr/cyelp	HRČAK platform Home page	HWs	EN
Pilar	Croatia	1846-3010		1846-3010.pdf	https://hrcak.srce.hr/upute/guide_authors_PILAR_-_Croatian_Journal_of_Social_Sciences_and_Humanities.pdf	Instructions for authors	ItAs	EN
Ljetopis socijalnog rada	Croatia	1846-5412	1848-7971	1846-5412.pdf	https://hrcak.srce.hr/upute/guide_reviewers_Ljetopis_socijalnog_rada.pdf	Guidelines for reviewers	ItRs	EN
Godišnjak Akademije pravnih znanosti Hrvatske	Croatia	1847-7615	1849-0778	1847-7615_1.docx	https://hrcak.srce.hr/upute/guide_reviewers_Godisnjak_Akademije_pravnih_znanosti_Hrvatske.docx	Instructions to reviewers	ItRs	EN
Godišnjak Akademije pravnih znanosti Hrvatske	Croatia	1847-7615	1849-0778	1847-7615.docx	https://hrcak.srce.hr/upute/guide_authors_Godi%C5%A1njak_Akademije_pravnih_znanosti_Hrvatske.docx	Guidelines for authors	ItAs	EN
Hrvatska i komparativna javna uprava : časopis za teoriju i praksu javne uprave	Croatia	1848-0357	1849-2150	1848-0357.docx	https://hrcak.srce.hr/upute/guide_reviewers_Hrvatska_i_komparativna_javna_uprava.doc	Review process and instructions to reviewers	ItRs	EN
Zagrebačka pravna revija	Croatia		1848-6118	1848-6118.mhtml	https://hrcak.srce.hr/zpr	HRČAK platform Home page	HWs	EN
FIP - Financije i pravo	Croatia	1849-241X	1849-4803	1849-241X.html	https://hrcak.srce.hr/financije-i-pravo	HRČAK platform Home page	HWs	EN
InterEULawEast: journal for the international and european law, economics and market integrations	Croatia	1849-3734	1849-4439	1849-3734	https://hrcak.srce.hr/upute/guide_reviewers_InterEULawEast_-_Journal_for_International_and_European_Law__Economics_and_Market_Integrations.pdf	Paper Review form	RevForm	EN
Revista Catalana de Dret Públic	Spain	1885-5709	1885-8252	1885-5709_1.docx	Editorial Policies (gencat.cat)	Editorial Policies	EdPol	EN
Stato Chiese e pluralismo confessionale	Italy	1971-8543		1971-8543.docx	https://www.statoechiese.it/it/site/page/valutazione	Valutazione	PRPol	IT
Teoria e critica della regolazione	Italy	1970-5476		1970-5476.docx	https://www.mimesisjournals.com/ojs/index.php/tcrs/about	About the journal	AboutJ	EN
REVISTA GENERAL DE DERECHO PÚBLICO COMPARADO	Spain	1988-5091		1988-5091_1.pdf	Instrucciones_14.pdf (iustel.com)	INSTRUCCIONES A LOS AUTORES	ItAs	SP
Cuadernos de Derecho Transnacional	Spain		1989-4570	1989-4570_1.docx	Editorial Policies (uc3m.es)	Editorial Policies	EdPol	EN
Revista de Estudios de la Administración Local y Autonómica	Spain		1989-8975	1989-8975_1.docx	Reviewer guidelines | Revista de Estudios de la Administración Local y Autonómica (inap.es)	Reviewer guidelines	ItRs	EN
Revista de Estudios de la Administración Local y Autonómica	Spain		1989-8975	1989-8975_2.docx	About the Journal | Revista de Estudios de la Administración Local y Autonómica (inap.es)	About the Journal	AboutJ	EN
Osservatorio sulle fonti	Italy	2038-5633		2038-5633.pdf	https://www.osservatoriosullefonti.it/altro/1492-regolamento-valutazione-contributi/file	Regolamento per la valutazione scientifica dei contributi proposti alla Rivista1	ItRs	IT
Političke perspektive	Croatia	2217-561X	2335-027X	2217-561X.mhtml	https://hrcak.srce.hr/politicke-perspektive	HRČAK platform Home page	HWs	EN
Persona e Mercato	Italy	2239-8570		2239-8570.docx	http://www.personaemercato.it/regolamento/	Codice etico	PubEth	IT
Diritto penale contemporaneo	Italy	2240-7618		2240-7618.doc	https://dpc-rivista-trimestrale.criminaljusticenetwork.eu/it/peer-review	Peer review	PRPol	IT
Diritti fondamentali	Italy	2240-9823		2240-9823.docx	https://dirittifondamentali.it/home/regolamento-per-linvio-e-la-valutazione-dei-contributi/	Regolamento per l’invio e la valutazione dei contributi	ItRs	IT
Nomos	Italy	2279-7238		2279-7238.pdf	http://www.nomos-leattualitaneldiritto.it/wp-content/uploads/2013/03/Peer-review-Nomos.pdf	Note per gli autori	ItAs	IT
Historia et Ius	Italy	2279-7416		2279-7416.docx	http://www.historiaetius.eu/pubblicare-sulla-rivista.html	How to submit an article to the journal	ItAs	EN
Rivista di diritto bancario	Italy	2279-9737		2279-9737.docx	https://rivista.dirittobancario.it/norme	NORME PER LA VALUTAZIONE E LA PUBBLICAZIONE E CODICE ETICO	PRPol	IT
Opinio Juris in Comparatione	Italy	2281-5147		2281-5147.docx	https://www.opiniojurisincomparatione.org/policies/#peer	Policies	EdPol	EN
Orizzonti del diritto commerciale	Italy	2282-667X	2282-667X	2282-667X.docx	http://www.rivistaodc.eu/Page/t01/view_html?idp=50	Proedura di revisione	PRPol	IT
OIDU - Ordine Internazionale e Diritti Umani	Italy	2284-3531		2284-3531	http://www.rivistaoidu.net/content/codice-etico	Codice etico	PubEth	IT
BioLaw Journal - Rivista di BioDiritto	Italy	2284-4503	2284-4503	2284-4503.html	http://rivista.biodiritto.org/ojs/index.php?journal=biolaw&page=about&op=editorialPolicies	Editorial Policies	EdPol	EN
ArchivioPenale.it	Italy	2384-9479		2384-9479.docx	https://archiviopenale.it/peer-review/contenuti/6492	Valutazione scientifica	ItRs	IT
The Italian law Journal	Italy	2421-2156		2421-2156.docx	https://www.theitalianlawjournal.it/submissions/	Submissions	ItAs	EN
Jus civile	Italy	2421-2563		2421-2563.docx	http://www.juscivile.it/index.php?p=regolerevisione	Regole per la revisione	ItRs	IT
Hrvatski ljetopis za kaznene znanosti i praksu	Croatia	2459-6531	2670-9996	2459-6531.mhtml	https://hrcak.srce.hr/hljkzp?lang=en	HRČAK platform Home page	HWs	EN
Forum za sigurnosne studije	Croatia	2459-6639		2459-6639.html	https://hrcak.srce.hr/forum-za-sigurnosne-studije	HRČAK platform Home page	HWs	EN
Public Sector Economics	Croatia		2459-8860	2459-8860.doc	http://www.pse-journal.hr/upload/files/download/PSE_Ethics.pdf	Ethical Guidelines for Journal Publication	PubEth	EN
Public Sector Economics	Croatia		2459-8860-1	2459-8860-1.mhtml	http://www.pse-journal.hr/en/for-authors/	For Authors	ItAs	EN
Società e diritti	Italy	2531-6710		2531-6710.docx	https://riviste.unimi.it/index.php/SED/about	About the Journal	AboutJ	IT
Paragraf: časopis za pravna i društvena pitanja Pravnog fakulteta Sveučilišta Josipa Jurja Strossmayera u Osijeku	Croatia	2584-3613	2584-3621	2584-3613.pdf	https://hrcak.srce.hr/upute/guide_authors_Paragraf.pdf	Instructions for authors	ItAs	EN
Zbornik sveučilišta Libertas	Croatia	2584-5055	2584-6167	2584-5055.pdf	https://hrcak.srce.hr/upute/upute_autorima_Zbornik_sveucilista_Libertas.pdf	Upute autorima	ItAs	HR
